1  
2  
3  
4  
5  
6  
7  
8  
9  
10 Agrin/Lrp4 signal constrains MuSK activity during neuromuscular synapse development in  
11 appendicular muscle  
12

13 Lauren J Walker<sup>1</sup>, Rebecca A Roque<sup>1</sup>, Maria F Navarro<sup>1</sup>, and Michael Granato<sup>1\*</sup>

14 Department of Cell and Developmental Biology, Perelman School of Medicine, University of  
15 Pennsylvania, Philadelphia, Pennsylvania, United States of America  
16

17 \*Corresponding author

18 E-mail: granatom@pennmedicine.upenn.edu (MG)  
19

20 Running Title: Appendicular NMJ development  
21

22 Key words: zebrafish, appendicular, neuromuscular junction, Agrin, Lrp4, MuSK  
23  
24

## 25 SUMMARY STATEMENT

26 In addition to their conserved roles in neuromuscular development of axial muscle, we uncover a  
27 second role for Agrin and Lrp4 to constrain MuSK activity in appendicular muscle

## 29 ABSTRACT

30 The receptor tyrosine kinase MuSK, its co-receptor Lrp4 and the Agrin ligand constitute a signaling  
31 pathway critical in axial muscle for neuromuscular synapse development, yet whether this pathway  
32 functions similarly in appendicular muscle is unclear. Here, using the larval zebrafish pectoral fin,  
33 equivalent to tetrapod forelimbs, we show that like axial muscle, developing appendicular muscles  
34 develop aneural acetylcholine receptor (AChR) clusters prior to innervation. As motor axons arrive,  
35 neural AChR clusters form, eventually leading to functional synapses in a MuSK-dependent manner.  
36 Surprisingly, we find that loss of Agrin or Lrp4 function, which abolishes synaptic AChR clusters in axial  
37 muscle, results in enlarged presynaptic nerve endings and progressively expanding appendicular  
38 AChR clusters, mimicking the consequences of motoneuron ablation. Moreover, *muskl* depletion in *lrp4*  
39 mutants partially restores synaptic AChR patterning. Combined, our results provide compelling  
40 evidence that, in contrast to axial muscle in which Agrin/Lrp4 stimulates MuSK activity, Agrin/Lrp4  
41 signaling in appendicular muscle constrains MuSK activity to organize neuromuscular synapses. Thus,  
42 we reveal a previously unappreciated role for Agrin/Lrp4 signaling, thereby highlighting distinct  
43 differences between axial and appendicular synapse development.

## 45 INTRODUCTION

46 Movement depends on coordinating development of functional synapses called neuromuscular  
47 junctions (NMJs) between motor axons and skeletal muscle. Prior to axon arrival, the central region of  
48 muscles exhibit a 'prepattern' of clustered acetylcholine receptors (AChR), which requires the receptor  
49 tyrosine kinase MuSK. Prepatterning is important for axon guidance, as axons navigate towards  
50 aneural AChR clusters on muscles and incorporate them into newly formed NMJs (Panzer et al., 2006).  
51 Disruption of prepatterning, such as in *muskl* mutants, leads to exuberant motor axon outgrowth (Jing  
52 et al., 2009; Kim and Burden, 2008). Subsequently, as motor axons contact the muscle and transform  
53 into nerve endings, they release the glycoprotein Agrin which binds to the low-density lipoprotein  
54 receptor-related protein 4 (Lrp4) on the muscle membrane to stimulate phosphorylation of MuSK. Upon  
55 activation, MuSK initiates a downstream signaling cascade to cluster AChRs in apposition to axons,  
56 thereby forming neural synapses. While there are many additional proteins that modulate NMJ  
57 development, mutants of *lrp4*, *agrin*, and *muskl* all fail to form NMJs in the mouse and zebrafish trunk,

58 demonstrating their critical and conserved role in this process (Kim and Burden, 2008; Kim et al., 2008;  
59 Zhang et al., 2008; Jing et al., 2010; Remédo et al., 2016; Gribble et al., 2018). The muscular system  
60 is comprised of two divisions: axial and appendicular muscles. Axial muscles, such as the diaphragm,  
61 attach to the bones of the trunk whereas appendicular muscles move appendages, such as limbs.  
62 Extensive work on neuromuscular synapse development that identified the Agrin/Lrp4/MuSK pathway  
63 has focused predominantly on axial muscles. In contrast, significantly less is known about the cellular  
64 and molecular mechanisms critical for NMJ development in appendicular muscles.

65 Here, we employ the larval zebrafish pectoral fin, which is evolutionarily analogous to tetrapod  
66 forelimbs (Mercader, 2007), to study the process of neuromuscular synapse development in a paired  
67 appendage. In development, fin buds arise from mesenchymal protrusions oriented vertically just dorsal  
68 to the yolk and lateral to the second and third myotome (Grandel and Schulte-Merker, 1998). As the fin  
69 bud forms into the pectoral fin, it rotates approximately 90 degrees so the tip points caudally.  
70 Additionally, the fin migrates anteriorly, such that it is positioned posterior to the otic vesicle and anterior  
71 to the yolk by 60 hours post fertilization (hpf). At 120 hpf (5 days post fertilization (dpf)), pectoral fins  
72 are comprised of two antagonistic muscles, the abductor and adductor, separated by an endoskeletal  
73 disk (Fig. 1A,B). Each muscle consists of ~50-55 fast-twitch muscle fibers that extend longitudinally  
74 from the proximal fin base, where it attaches to the trunk, out to the distal tip of the fin. At the fin base  
75 the abductor and adductor muscles are each 2-3 muscle fibers thick, but muscles then thin out to be a  
76 single fiber layer throughout most of the fin (Thorsen et al., 2004). The abductor and adductor muscles  
77 are innervated by 4 distinct motor nerves, which we refer to here as nerves 1-4, with cell bodies in  
78 anterior spinal cord segments 3 through 6 (Myers, 1985; Thorsen and Hale, 2007). Motor axons enter  
79 the fin at a dorsal (nerves 1-3) or ventral (nerve 4) plexus to sort between the abductor or adductor  
80 muscles (Thorsen and Hale, 2007). Axons then progressively defasciculate as they grow towards the  
81 distal tip of the fin such that each muscle fiber is polyinnervated and motor axons create a patchwork  
82 pattern across the fin muscles. This innervation pattern remains unchanged until juvenile stages at  
83 three weeks (5.4-5.8 mm) when the muscles divide, nerves increase in arborization, and bone forms  
84 (Grandel and Schulte-Merker, 1998; Thorsen and Hale, 2007). The genetic-tractability, transgenic tools  
85 to label specific cell types, optical transparency suitable for live imaging, and behavioral readout of fin  
86 movement make the larval zebrafish pectoral fin an ideal vertebrate system to interrogate mechanisms  
87 of neuromuscular synapse development within appendicular muscles.

88 The axial trunk and the pectoral fin neuromuscular systems differ in several key ways. First, axon  
89 innervation of the axial muscles begins between 16-24 hours post fertilization (hpf) (Eisen et al., 1986)  
90 whereas in appendicular/fin muscles it is delayed by approximately 24 hours. Secondly, the trunk and

91 the fin differ broadly in their muscle fiber anatomy. The trunk is comprised of several medial layers of  
92 fast-twitch (fast) muscle fibers and a single lateral slow-twitch (slow) muscle fiber layer that are  
93 arranged in repeating segments. In contrast, the fin muscles are only 1 fiber thick, comprised solely of  
94 fast fibers, and are approximately 2.5 times longer than trunk muscle fibers (Thorsen and Hale, 2007).  
95 Additionally, after exiting the spinal cord, axons in the trunk grow perpendicular to and along the center  
96 of muscle fibers. In contrast, the motor axons that innervate the pectoral fin grow through the body wall,  
97 sort at a plexus and then branch to create elaborate innervation patterns that can be perpendicular to  
98 and also parallel to muscle fibers in the fin. Axonal innervation of the fin is topographic, with axons from  
99 anterior spinal segments innervating the dorsal fin and axons from posterior segments innervating the  
100 ventral fin (Thorsen and Hale, 2007). Finally, in the trunk, aneural AChRs are present on slow muscle  
101 fibers, which are absent in the pectoral fin (Flanagan-Steet et al., 2005). Whether AChRs are  
102 prepatterned and how axon outgrowth occurs in the pectoral fin has not yet been described.

103 While many of the signals that mediate NMJ development have been well-characterized in axial  
104 muscles, whether the same cellular and molecular mechanisms underlie NMJ development within the  
105 complicated muscle arrangement of paired appendages has remained unclear. Here, we reveal that  
106 while some aspects of neuromuscular synapse development, such as pre patterning with aneural AChR  
107 clusters and the requirement for MuSK to form neural AChR clusters, are shared between the trunk  
108 and the pectoral fin, there are key muscle-specific differences in the fin. We show that both axonally  
109 released Agrin and Lrp4 on muscle cells are required to form the distributed patterning of AChR clusters  
110 in the fin. While *agrin* and *lrp4* mutants fail to form synapses in the trunk, in the pectoral fin they instead  
111 lead to the formation of giant AChR clusters and axonal innervation abnormalities. A developmental  
112 timecourse in *agrin* mutant fins reveals that these clusters likely arise from prepatterned AChR clusters  
113 that continue to grow over time. These giant clusters sequester navigating growth cones, thereby  
114 disrupting the innervation patterning. Partial depletion of *muskl* moderately suppresses the formation of  
115 these clusters in *agrin* and *lrp4* mutants. Based on our results, we propose a model for NMJ formation  
116 in the appendicular fin muscle in which Agrin/Lrp4 signaling transitions MuSK from a pre patterning state  
117 to an axon-dependent, focal AChR clustering state. Without Agrin or Lrp4, MuSK remains active within  
118 prepatterned islands and AChR clusters grow. Importantly, this work exposes key differences in  
119 neuromuscular synapse development between axial muscles of the trunk and appendicular muscles of  
120 the pectoral fin.

## 123 RESULTS

### 124 Development of pectoral fin innervation is a tightly coordinated and dynamic process

125 At 120 hpf zebrafish pectoral fins have established a complex neuromuscular organization with  
126 motor axons forming an elaborate pattern across the abductor and adductor muscles. To visualize the  
127 organization between nerve and muscle within the fin we used transgenic *mnx1:GFP* or *Xla.tubb:dsRed*  
128 to label the majority if not all motor axons that innervate the pectoral fin and  *$\alpha$ -actin:GFP* to label  
129 pectoral fin muscle fibers (Fig. 1A-C). Although the fin is comprised of both abductor and adductor  
130 muscles with independent innervation fields (Fig. 1D, H), for simplicity we include only the abductor  
131 innervation unless otherwise noted (Fig. 1E-G). Labeling of nicotinic AChRs with  $\alpha$ -bungarotoxin ( $\alpha$ -  
132 Btx) revealed hundreds of small, evenly spaced *en passant* neuromuscular synapses juxtaposed to  
133 motor axons (Fig. 1F-G). The largest postsynaptic AChR clusters are associated with the major nerve  
134 branch localized closest to the proximal fin base, while AChR clusters are smaller as the finer nerve  
135 branches defasciculate towards the distal tip of the fin musculature.

136 The developing pectoral fin is a dynamic structure. Previous work has described the development  
137 of the structure of the fin, from fin bud to adult (Yano et al., 2012; Siomava et al., 2018), as well as the  
138 innervation and musculature of the fin after 120 hpf (Thorsen and Hale, 2007), a timepoint at which the  
139 larval innervation pattern is relatively stable. Yet, to our knowledge the development of the zebrafish  
140 pectoral fin musculature and its complex innervation pattern prior to 120 hpf have not been described.  
141 To observe the process of muscle development and axonal innervation of the pectoral fin, we used  
142 long-term timelapse imaging of transgenic embryos to observe muscles (*Tg( $\alpha$ -actin:GFP)*) and axons  
143 (*Tg(Xla.tubb:dsRed)*) in developing zebrafish. By approximately prim-25 (36 hpf), motor axons from  
144 nerves 1-3 coalesce at what will form the dorsal plexus and nascent muscle fibers in the pectoral fin  
145 bud, located laterally to the axons, have just started expressing  *$\alpha$ -actin:GFP* (Fig. 2A-B, Movie S1).  
146 Muscle fibers continue to divide and reorganize through the long-pec stage as the fin moves further  
147 medial, closer to the plane of the dorsal plexus, and motor axons begin to grow into the abductor and  
148 then adductor muscles beginning around the long-pec stage at 46 hpf. Concurrently, axons in nerve 4  
149 make a sharp turn dorsally to innervate the fin via the ventral plexus. Thick axon bundles first grow  
150 perpendicular to muscle fibers near the proximal fin base, but subsequently axons turn posteriorly to  
151 grow mostly parallel to muscle fibers and towards the fin tip. As muscle fibers elongate, branching motor  
152 axons follow close behind to form a diffuse innervation network. By ~68 hpf, a simplified innervation  
153 pattern is established (Fig. 2B,G) that will become more complex through 120 hpf. Thus, the  
154 development of the innervation and musculature of the pectoral fin is a highly dynamic yet tightly  
155 coordinated process.

156 Pectoral fins start moving rhythmically as early as 3 dpf (Uemura et al., 2020), prompting us to  
157 examine when during development neuromuscular synapses in the pectoral fin form, and to what  
158 degree this process mirrors synapse development in axial muscle. To observe neuromuscular synapse  
159 development in pectoral fins we fixed transgenic *mnx1:GFP* larvae (to label presynaptic motor axons)  
160 at various timepoints and labeled AChRs with fluorescently-conjugated  $\alpha$ -Btx. In vertebrates,  
161 'prepatterned' AChR clusters form on muscle fibers prior to motor neuron innervation (Lin et al., 2001;  
162 Yang et al., 2001), but whether or when this occurs in developing appendicular muscle of pectoral fins  
163 has not been investigated. At the high-pec stage (~42 hpf), when the pectoral fin bud is located lateral  
164 to the nascent dorsal plexus and axons have not yet entered the fin, AChR clusters are undetectable  
165 (Fig. 2C). By 46 hpf, as axons have just started to grow past the plexus onto the fin musculature, we  
166 observe small AChR clusters near the base of the fin that are not yet associated with labeled axons  
167 (Fig. 2D). At 51 hpf, axons growing from the dorsal and ventral plexi extend towards each other along  
168 the fin base and innervate nearby AChR clusters, while remaining axon free or aneural AChR clusters  
169 at the not yet innervated medial region of the fin increase in size (Fig. 2E). By 60 hpf all AChR clusters  
170 at the proximal fin base are associated with axons (Fig. 2F).

171 The entry of axons into the fin initiates a second phase of neuromuscular synapse formation. As  
172 axons grow beyond the fin base and branch to extend along muscle fibers, new AChR clusters are  
173 formed. These new AChR clusters are always associated with axons (Fig. 2F-G). The number of AChR  
174 clusters increases as the innervation pattern becomes more complex, such that by 120 hpf axons are  
175 dotted with hundreds of regularly spaced AChR clusters that remain relatively small ( $<5 \mu\text{m}^2$ ) (Fig. 2G).  
176 In contrast, the clusters at the fin base that preceded axon outgrowth continue to increase in size,  
177 perhaps as they are innervated by additional axons, such that by 120 hpf the biggest AChR clusters in  
178 the fin ( $>20 \mu\text{m}^2$ ) are in this proximal region. Thus, neuromuscular synapse development in  
179 appendicular muscle of the pectoral fin mirrors that in axial muscle of the trunk, with a prepatterned  
180 phase and an axon-associated phase of synapse formation.

### 181 **MuSK signaling is required for neuromuscular synapse development in pectoral fin muscle**

182 Given the similarities in AChR pre patterning and axon-associated AChR clustering between the  
183 trunk and the pectoral fin, we wondered if the well-established genetic pathway that regulates  
184 neuromuscular synapse development in axial muscle is also critical for this process in pectoral fin  
185 muscle. In vertebrate axial muscles, AChR pre patterning and the formation of neuromuscular synapses  
186 requires the receptor tyrosine kinase MuSK (DeChiara et al., 1996; Lefebvre et al., 2007). We first  
187 asked if *musk* is also required for AChR pre patterning within larval zebrafish appendicular muscle by  
188 staining sibling and *musk* mutant pectoral fins with  $\alpha$ -Btx to label AChR clusters during the time of axon



189 navigation into the fin. At the long-pec stage (46 hpf), when wildtype sibling animals have developed  
190 robust prepatterned aneural AChR clusters, staining of *musk* mutant pectoral fins failed to reveal any  
191 evidence of prepatterned AChR clusters (Fig. S1). To account for a possible delay in pectoral fin  
192 development or aneural cluster formation we also examined *musk* mutants at later timepoints. At 51  
193 hpf and 60 hpf, the extent of axon growth in the fin is comparable between siblings and *musk* mutants.  
194 At these timepoints wild type axons have innervated prepatterned AChR clusters and new clusters  
195 have formed, while in *musk* mutant fins  $\alpha$ -Btx staining remains diffuse and muscles lack discernible  
196 AChR clusters. Thus, as in trunk axial muscle, *musk* is required for AChR pre patterning in appendicular  
197 fin muscle.

198 Next, we examined the role of MuSK in the formation of neural AChR clusters characteristic of  
199 neuromuscular synapses. In the zebrafish trunk, motor axons branch and form synapses distributed  
200 along myofibers throughout the myotome. Consistent with previous work (Lefebvre et al., 2007; Jing et  
201 al., 2010), we find that at 120 hpf, trunk axial muscle fibers in *musk* mutants exhibit diffuse bungarotoxin  
202 staining with fewer and smaller AChR clusters, compared to sibling controls (Fig. 3 A-B, D). Similar to  
203 what we observe in trunk axial muscle fibers, appendicular muscle fibers in *musk* mutants display  
204 mostly diffuse bungarotoxin staining and lack wild type-like AChR clusters (Fig. 3C). While *musk*  
205 mutants exhibit some AChR clusters that form in apposition to axons, compared to sibling controls they  
206 are fewer and smaller in size. These circular clusters resemble the dystroglycan-dependent clusters  
207 that form on zebrafish axial muscle fibers in the absence of *musk* (Lefebvre et al., 2007). Moreover,  
208 compared to wild type controls, motor axons in *musk* mutant pectoral fins are less fasciculated, similar  
209 to what has been reported previously for axial muscle fibers in zebrafish and mouse lacking MuSK  
210 (Kim and Burden, 2008; Jing et al., 2009).

211 Finally, we asked whether MuSK acts through its well-established downstream effector Rapsyn  
212 during appendicular neuromuscular development. Like *musk*, *rapsyn* is required for AChR clustering in  
213 mouse and zebrafish axial muscle (Gillespie et al., 1996; Ono et al., 2002). Similar to its role in axial  
214 muscle, *rapsyn* is required for AChR clustering in the pectoral fin, as *rapsyn* mutants display diffuse  $\alpha$ -  
215 Btx signal throughout pectoral fin muscles (Fig. S2). Yet interestingly, in contrast to *musk* mutants,  
216 which have a defasciculated and overgrown pectoral fin axon patterning (Fig. 3C, 7B), we find that  
217 motor neuron innervation in the pectoral fin of *rapsyn* mutants is indistinguishable from wildtype (Fig.  
218 S2), similar to what has been observed in *rapsyn* mutant trunk innervation (Zhang et al., 2004; Gribble  
219 et al., 2018). Thus, *musk* and *rapsyn* are required for NMJ development in the pectoral fin, suggesting  
220 that postsynaptic mechanisms critical for synapse formation are shared between trunk and  
221 appendicular muscle.

## **Axonal derived signals are critical for appendicular AChR patterning**

Neuromuscular junction development requires precise, bidirectional coordination between axons and muscles. To determine the overall role of motor axon derived signals on the postsynaptic innervation pattern, we laser-ablated the motor neurons that innervate the dorsal portion of the pectoral fin muscle. Specifically, we ablated the cell bodies of motor neurons in spinal segments 3-6 at 42 hpf, prior to the growth of motor axons into the pectoral fin bud, and then re-ablated any newly formed motor neurons 24 hours later. Importantly, we left intact all motor neurons in spinal segment 4, which innervate the ventral muscle region of the fin, to serve as an internal control when comparing the innervation patterns of innervated and nerve-deprived muscle fibers. As expected, at 120 hpf AChR patterning in the innervated ventral region of the fin was indistinguishable compared to non-ablated controls, with small, evenly spaced AChR clusters in apposition to axons (Fig. 4A-C). Surprisingly, in the dorsal region of the motor neuron-ablated fin, which had never been innervated, fewer but much larger AChR clusters formed (Fig. 4C). These clusters were globular and evenly dispersed throughout the non-innervated musculature and differ vastly in size and distribution from those observed in the absence of MuSK or Rapsyn (Fig. 3; Fig. S2). Thus, while lack of the MuSK-dependent postsynaptic signal transduction machinery blocks the formation of AChR clusters almost completely, absence of axonal-derived signals results in unpatterned yet exuberantly sized AChR clusters, which going forward we refer to as giant AChR clusters. We conclude that axonal-derived signals are critical for AChR patterning and for limiting AChR cluster size.

## **Agrin and Lrp4 are required for appendicular neuromuscular development**

The opposing consequences of blocking MuSK-dependent postsynaptic signaling versus eliminating all presynaptic signaling prompted us to examine the role of signaling components that activate MuSK. The heparan sulfate proteoglycan Agrin is an axon-derived signal that coordinates MuSK-dependent AChR clustering between nerve terminals and muscle fibers (Kim et al., 2008; Zhang et al., 2008), and zebrafish mutants lacking the motoneuron-derived Agrin isoforms lack synaptic AChR clusters along axial trunk muscle fibers (Fig. 5A) (Gribble et al., 2018). We therefore hypothesized that Agrin might play a similar critical role in inducing neural AChRs in pectoral fin muscle fibers. Throughout the fin of wild type siblings, hundreds of  $<5 \mu\text{m}^2$  AChR clusters are evenly distributed along appendicular muscles fibers. In contrast, AChR clusters in *agrin* mutants were reduced in numbers yet increased in size ( $>20 \mu\text{m}^2$ ) (Fig. 5B, E), indistinguishable from the giant AChR clusters we observed in nerve-deprived fins (Fig. 4C). To quantify the number of neural AChR clusters and their size distribution across genotypes, we focused on AChR clusters present on abductor muscle fibers, although quantification of adductor muscles across all genotypes revealed similar results (Fig. S3). Wildtype abductor muscle



255 fibers exhibit  $294.4 \pm 21.5$   $\alpha$ -Btx-positive AChR clusters per fin with a median cluster size of  $3.9 \pm 0.6$   
256  $\mu\text{m}^2$  (Fig. 5C-E). In contrast, *agrin* mutant abductor muscle fibers have significantly fewer clusters per  
257 fin ( $51.6 \pm 5.9$ , unpaired t-test  $p < 0.0001$ ) yet exhibit a vastly increased median cluster size of  $18.4 \pm 4.7$   
258 (t-test  $p < 0.0001$ ). Thus, in striking contrast to *agrin* mutant trunk muscle fibers that exhibit only small  
259 AChR clusters (median cluster size, siblings:  $3.5 \pm 0.7 \mu\text{m}^2$  ( $n=17$ ), *agrin*<sup>-/-</sup>:  $1.7 \pm 0.7 \mu\text{m}^2$  ( $n=9$ ), t-test  
260  $p < 0.0001$ ), *agrin* mutant appendicular muscle fibers exhibit greatly enlarged AChR clusters.

261 The strikingly divergent appendicular NMJ phenotypes observed in *muskl* mutants that display an  
262 almost complete loss of AChR clusters versus the giant AChR clusters present in *agrin* mutants  
263 prompted us to examine the role of the Agrin receptor Lrp4. Upon binding Agrin, Lrp4 induces MuSK  
264 phosphorylation to initiate synaptic differentiation (Kim et al., 2008; Zong et al., 2012). To determine  
265 whether *Lrp4* mutants display the phenotype exhibited by its canonical ligand Agrin or by its co-receptor  
266 MuSK, we examined the role of Lrp4 in appendicular neuromuscular development. Like *muskl* and *agrin*,  
267 *Lrp4* is required for neuromuscular junction development in axial muscles of the zebrafish trunk, as  
268 mutants form fewer and smaller synapses (Remédios et al., 2016). Identical to the *agrin* mutant fin  
269 muscle phenotype, and in contrast to the *Lrp4* mutant phenotype in axial trunk muscles (Remédios et al.,  
270 2016), at 120 hpf *Lrp4* mutant pectoral fin muscles displayed large AChR clusters (Fig. 6A-B, D-F).  
271 Moreover, in fins of *Lrp4* mutants lacking the intracellular domain (Saint-Amant et al., 2008) we also  
272 observe giant AChR clusters (Fig. S4), providing compelling evidence that Lrp4 acts through a ligand-  
273 dependent mechanism to regulate appendicular NMJ development. Despite the abnormal AChR  
274 clusters in *Lrp4* mutants, we failed to detect differences in the morphology of muscles or muscle fibers  
275 in pectoral fin muscles labeled with *Tg( $\alpha$ -actin:GFP)* indicating that in these mutants appendicular  
276 muscle development is unaffected (Fig. S4). Interestingly, co-labeling of AChR clusters and muscle  
277 fibers reveals that the enlarged clusters in *Lrp4* mutants often nestle between adjacent muscle fibers  
278 but can also span across multiple fibers, similar to the enlarged clusters near the proximal fin base in  
279 wild type pectoral fins, suggesting extrinsic coordination between muscle fibers to form or stabilize  
280 these giant AChR clusters. Finally, expressing Lrp4 using a muscle specific promoter *Tg( $\alpha$ -actin:*Lrp4*-  
281 *GFP*)* (Gribble et al., 2018) in otherwise *Lrp4* mutant animals fully restored neuromuscular synapse  
282 development in appendicular muscle fibers (Fig. 6C-F), indicating that Lrp4 functions in muscle. Thus,  
283 loss of Agrin or Lrp4, while associated with a significant reduction in neural AChR cluster numbers in  
284 both axial and appendicular muscle, also leads to an increase in AChR cluster size on appendicular  
285 muscle, distinct from their mutant phenotypes in axial muscle.

## 287 **Agrin/Lrp4 regulates the size and patterning of appendicular neuromuscular synapses**

288 The giant AChR clusters we observe on appendicular muscle fibers of nerve-deprived pectoral fins  
289 as well as in *agrin* and *Lrp4* mutants resemble what has previously been described in *Xenopus* and  
290 chick muscle cells grown in the absence of axons as AChR ‘hot spots’, which disperse upon innervation  
291 (Bekoff and Betz, 1976; Moody-Corbett and Cohen, 1982; Peng, 1986). We therefore asked whether  
292 these giant AChR clusters we observe in *agrin* or *Lrp4* mutant pectoral fins are caused by the lack of  
293 axonal innervation. Analysis of the axonal innervation pattern in wildtype and mutant animals at 120  
294 hpf revealed that in both *agrin* and *Lrp4* mutants the overall innervation pattern and extent of axon  
295 growth in pectoral fins is comparable to that of wild type, indicating that overall axon guidance  
296 mechanisms are largely intact. However, unlike in wild type siblings, in both *agrin* and *Lrp4* mutant fins  
297 we observe large axonal ‘swellings’ (Fig. 5B; 6B). These axonal swellings co-localize with the enlarged  
298 postsynaptic AChR clusters, supporting the notion that, rather than being aneural AChR hot spots,  
299 these giant AChR clusters are indeed innervated and do not disperse upon axon contact. Moreover,  
300 expressing *Lrp4* using a muscle specific promoter *Tg( $\alpha$ -actin:*Lrp4*-GFP)* (Gribble et al., 2018) in  
301 otherwise *Lrp4* mutant animals fully suppressed formation of presynaptic axonal swellings (Fig. 6C-F),  
302 indicating that muscle-derived *Lrp4* signaling plays a role in establishing both presynaptic and  
303 postsynaptic neuromuscular synapse patterning.

304 To further investigate the nature of these axonal swellings, we used the Znp-1 antibody against the  
305 presynaptic marker Synaptotagmin 2. In sibling control pectoral fins, the Znp-1 signal concentrates at  
306  $\alpha$ -Btx-positive postsynaptic areas, demarcating presumptive presynaptic sites. Similarly, in *agrin*  
307 mutant pectoral fins, the Znp-1 signal colocalizes with the giant AChR clusters (Fig. S5). Likewise, we  
308 assessed the localization of the postsynaptic protein Dystrophin (*Dmd*) by analyzing a gene trap line  
309 (*dmd-citrine*) that labels endogenous *Dmd* (Ruf-Zamojski et al., 2015). The *Dmd*-citrine signal in sibling  
310 control pectoral fins is diffuse, with concentrations between muscle fibers and at synaptic regions, which  
311 we confirmed by co-labeling with fluorescent  $\alpha$ -Btx. Similarly, in *Lrp4* mutant pectoral fins, the *Dmd*-  
312 citrine signal is concentrated at regions marked by presynaptic axonal swellings and enlarged  
313 postsynaptic AChR clusters (Fig. S6). Thus, while in *agrin* and *Lrp4* mutants AChR cluster size and  
314 distribution is altered, both presynaptic and postsynaptic proteins are recruited to these giant clusters  
315 suggesting that they are *bona fide* synapses.

316 We next examined the prominent presynaptic ‘swellings’ in *Lrp4* and *agrin* mutants that form in  
317 opposition to enlarged AChR clusters. The *mnx1:GFP* or *Xla.tubb:dsRed* transgenic lines both label  
318 the entire population of motor axons in the pectoral fin, precluding us from visualizing the nature of  
319 these presynaptic swellings at the single axon level. These innervation swellings could be formed by

1) local distension or an increase in diameter of individual axons, 2) many individual axons forming synapses in a single spot on a muscle fiber, 3) abnormally enlarged axonal endings in a single spot on a muscle fiber, or 4) individual axons looping continuously in a single spot on a muscle fiber. To determine how individual axons contribute to the innervation swellings, we employed a sparse labeling strategy using *mnx1:mKate* to visualize individual axons in the context of the entire population of motor axons (*mnx1:GFP*). We screened for larvae that expressed *mnx1:mKate* in only a few of the motor neurons that innervate the pectoral fin. In wild type siblings, we find that single axons branch and fasciculate with other axons to form complex patterns. Axons terminate abruptly, with endings that are approximately the same diameter as the rest of the labeled axon (Fig. 6G-H). In *lrp4* mutants, most individually labeled axons exhibit similarly complex trajectories, are similar in diameter to sibling controls, and occasionally form simplified endings. However, we also observed individual *mnx1:Kate*-positive axons that form bulbous and swollen structures. These globular endings of *mnx1:mKate* axons were part of larger *mnx1:GFP* swellings, indicating that many independent axons contribute to these swellings. As these swellings co-localize with  $\alpha$ -Btx (Fig. 6B), we conclude that despite their abnormal morphology, they represent presynaptic terminals. This result strongly suggests that during appendicular neuromuscular development Agrin/Lrp4-dependent signaling not only promotes the formation postsynaptic AChR clusters but also limits their size, possibly by dispersing nascent AChR clusters or limiting cluster growth. In addition, Agrin/Lrp4 signaling also influences presynaptic patterning. Independent of the precise mechanisms by which Agrin and Lrp4 regulate pre and postsynaptic development, our data reveal that the role of Agrin and Lrp4 in zebrafish appendicular fin is distinctly different from its well-characterized function in trunk axial muscle.

### ***musk* depletion partially suppresses the *lrp4* giant AChR cluster phenotype**

Our results reveal that, unlike in axial trunk muscle of mice and zebrafish in which *musk*, *lrp4*, and *agrin* mutants all phenocopy each other, in appendicular muscle of the zebrafish pectoral fin loss of *agrin* or *lrp4* results in a phenotype that is distinct from *musk* mutants. Specifically, in *musk* mutants, appendicular muscle displays an almost complete loss of AChR clusters, while in *agrin* and *lrp4* mutant appendicular muscle, albeit exhibiting reduced numbers of AChRs, display a prominent, strikingly divergent phenotype characterized by enlarged AChR clusters. Combined, this led us to first ask whether, in the context of appendicular NMJ development, Agrin and Lrp4 act through MuSK, similar to what is observed in axial trunk muscle. Indeed, we find that *musk;lrp4* double mutants recapitulate the *musk* mutant phenotype as they fail to cluster AChRs and display axon overgrowth, confirming that Lrp4 acts through MuSK in NMJ development in both axial and appendicular muscle (Fig. 7A-B).

352 As MuSK is necessary for both aneural and neural AChR clustering in the pectoral fin in both wild  
353 type and *lrp4* mutants and MuSK expression is sufficient to induce AChR clusters (Kim and Burden,  
354 2008), we hypothesized that MuSK drives the formation of the enlarged AChR clusters in the absence  
355 of *agrin* or *lrp4* mutants. This would suggest, unexpectedly, that in appendicular muscle Agrin/Lrp4 may  
356 restrict MuSK function. If so, we would predict that dampening MuSK activity in *lrp4* mutants would  
357 suppress the giant AChR cluster phenotype. To this end, we examined *lrp4* mutants that lack one copy  
358 of *musk* (*lrp4<sup>-/-</sup>;musk<sup>+/-</sup>*). Indeed, *lrp4* mutant animals that are also heterozygous for *musk* exhibit a less  
359 severe phenotype than *lrp4* homozygous mutants. While fins in *lrp4<sup>-/-</sup>;musk<sup>+/-</sup>* larvae still contained  
360 some giant AChR clusters, portions of the fins in these animals also contained smaller, evenly-  
361 dispersed neural clusters that resemble the sibling patterning. Additionally, the portions of the fin with  
362 smaller AChR clusters also lacked presynaptic axonal swellings. When compared to *lrp4<sup>-/-</sup>* mutants,  
363 *lrp4<sup>-/-</sup>;musk<sup>+/-</sup>* mutants displayed an increase in the number of  $\alpha$ -Btx-positive AChR clusters per fin (Fig.  
364 7E), a rescue of the median cluster size (Fig. 7F), and a rescue of the overall distribution of cluster  
365 sizes in the fin (Fig. 7G). In *lrp4<sup>-/-</sup>;musk<sup>+/-</sup>* pectoral fins, the giant clusters that formed often were closer  
366 to the proximal fin base, similar to the earlier-formed prepatterned clusters (Fig. 7D). In contrast, smaller  
367 clusters were often found in the distal fin, where AChR clusters formed later. This further supports the  
368 idea that Agrin/Lrp4 signaling restrains MuSK activity within appendicular muscle.

### 369 **Agrin/Lrp4 signaling restrains MuSK activity during appendicular NMJ development**

370 To further explore the idea that, unlike in axial muscle, in appendicular NMJ development Agrin  
371 plays a critical role in restraining MuSK activity, we examined the progression of appendicular NMJ  
372 development in siblings and *agrin* mutants. We hypothesized that prior to the arrival of motor axons,  
373 the Agrin-independent formation of aneural prepatterned AChR clusters should be indistinguishable  
374 between wild type and *agrin* mutants. Indeed, we find that at 46 hpf (the long-pec stage), while axons  
375 are sorting at the dorsal plexus prior to growing into the fin, *agrin* mutant fins are prepatterned with  
376 AChR clusters and are indistinguishable from siblings (Fig. 8A). Moreover, like sibling controls,  
377 navigating axons in *agrin* mutants tend to occupy the prepatterned region near the proximal fin prior to  
378 extending towards the distal fin (Fig. 8B). Subsequently, in wild type, the arrival of motor axons and the  
379 release of Agrin induces the formation of small neural clusters, akin to the process previously described  
380 in axial muscle (Panzer et al 2006).

381 If nerve derived Agrin indeed restrains MuSK activity, we predicted that in *agrin* mutants these  
382 initially aneural clusters would retain their size (or even grow), despite the arrival of motor axons. We  
383 also predicted that lack of Agrin-mediated local MuSK activation would result in the failure to form new  
384 small neural clusters that normally emerge along growing axons. Indeed, at 60hpf (pec fin stage) the

385 difference in cluster size, number, and distribution between genotypes is prominent. In wild type  
386 siblings, the AChR cluster field mirrors the innervation pattern. As motor axons continue to grow further  
387 towards the distal fin, even the furthest-reaching navigating axons are associated with small AChR  
388 clusters, suggesting that as axons grow, new clusters are rapidly formed. In contrast, in *agrin* mutants,  
389 AChR clusters have increased in size and remain globular (Fig. 8C). Unlike in wild type siblings, in *agrin*  
390 mutants presynaptic swellings apposed to AChR clusters become apparent by 72 hpf, with stretches  
391 of axon deprived of any discernible AChR clusters (Fig. 8D). This observation supports the idea that  
392 navigating growth cones are inappropriately attracted to and sequestered by these prepatterned  
393 'islands'. Between 72 and 120 hpf, both sibling and mutant axons continue to grow to occupy the entire  
394 muscle territory. In wild type siblings, the majority of the AChR clusters remain small (below 5  $\mu\text{m}^2$ ) and  
395 evenly-dispersed throughout the appendicular muscle. In contrast, in *agrin* mutants both presynaptic  
396 axonal swellings and neural AChR clusters continued to grow throughout the entire appendicular  
397 muscle (Fig. 8D-F). Thus, lack of *agrin* leads to a progressive size increase of synaptic AChR clusters,  
398 consistent with the idea that in wild type appendicular muscle Agrin functions to counteract or to restrain  
399 MuSK activity. Together, our results suggest a model for appendicular NMJ development in which  
400 Agrin/Lrp4 signaling, different from its sole role in axial muscle to activate MuSK and promote NMJ  
401 development, also restrains MuSK activity to properly size and pattern neuromuscular synapses.

## 403 DISCUSSION

404 Axial muscles of the mouse diaphragm or the larval zebrafish trunk have been major *in vivo* models  
405 to study neuromuscular synapse development. Genetic studies using these models have converged  
406 on an evolutionarily conserved, canonical pathway in which the axonally released glycoprotein Agrin  
407 binds its receptor Lrp4 on the muscle membrane to locally activate the receptor tyrosine kinase MuSK  
408 and cluster AChRs. Here, we employ the larval zebrafish pectoral fin as a genetically-tractable model  
409 system in which to study the development of the neuromuscular system within appendicular muscle.  
410 We use static and live-imaging to describe the coordinated growth of nascent muscle fibers, motor axon  
411 patterning, and postsynaptic AChR clustering in the fin. Using this framework, we provide compelling  
412 *in vivo* evidence that Agrin and Lrp4 play an additional, previously unappreciated role to regulate  
413 neuromuscular synapse development in appendicular muscle. We report that Agrin, Lrp4, and MuSK  
414 are required for the formation of neural AChR clusters in appendicular muscle, similar to their roles in  
415 axial muscle. In addition, we find that Agrin and Lrp4 play a second role to suppress the growth of  
416 aneural AChR clusters selectively in appendicular muscle. Consequently, only *lrp4* and *agrin* but not  
417 *musk* mutants form abnormally large postsynaptic AChR clusters in the pectoral fin. In addition,



418 Agrin/Lrp4 signaling influences presynaptic axonal patterning, as in *lrp4* and *agrin* mutants multiple  
419 axons inappropriately innervate these giant AChR clusters. The formation of these abnormal synapses  
420 can be partially suppressed by depleting *musk*, providing compelling genetic evidence that Agrin and  
421 Lrp4 constrain MuSK activity to establish appropriate neural synapse formation in appendicular muscle.  
422 Thus, our work reveals a key difference in the regulation of neuromuscular synapse development  
423 between two major divisions of the muscular system, i.e. axial and appendicular muscles.

### 424 **Key differences between axial versus and appendicular NMJ development**

425 In contrast to the neuromuscular system in axial muscle, little is known about the steps by which the  
426 complicated innervation pattern of appendicular muscle found in paired appendices including the  
427 pectoral fin arises, the genetic pathways that control it, nor how it might compare to NMJ development  
428 in axial muscles. Our work reveals key differences in neuromuscular synapse development between  
429 axial muscle in the zebrafish trunk and appendicular muscle in the pectoral fin. First, innervation of the  
430 trunk myotome occurs much earlier than the pectoral fin; trunk motor axon outgrowth begins at 16hpf  
431 (Panzer et al., 2006), whereas we first observe axons sorting at the fin plexus around 46 hpf. Secondly,  
432 both the trunk and the pectoral fin musculature are prepatterned with MuSK-dependent aneural AChR  
433 clusters. Somewhat surprisingly, prepatterned AChR clusters only form on adaxial, slow muscle fibers  
434 in the trunk (Flanagan-Steet et al., 2005; Panzer et al., 2006) and have not been detected in fast muscle  
435 fibers of the trunk, while in the pectoral fin, which lacks slow muscle fibers, prepatterned AChR clusters  
436 form exclusively on fast muscle fibers. This demonstrates that both slow and fast muscle fibers have  
437 the capacity to develop AChR pre patterning, thus it will be interesting to determine the mechanisms  
438 that selectively promote AChR pre patterning in trunk slow muscle and/or suppress it in adjacent fast  
439 muscle fibers. Third, in both zebrafish trunk and mouse diaphragm muscle, prepatterned AChRs are  
440 restricted to the central region of muscle fibers. We find that AChR pre patterning in pectoral fins is also  
441 restricted, but to the proximal region of individual muscle fibers. In the absence of live cell imaging, we  
442 cannot exclude the possibility that prepatterned AChR clusters initially arise in the 'center' of nascent  
443 pectoral fin muscle fibers, and, as these fibers elongate, clusters rapidly become off-center and shift  
444 towards the proximal region of muscle fibers. Independent of this possibility, our analysis of  
445 appendicular NMJ development reveals that AChR pre patterning is not strictly restricted to the center  
446 but instead can localize to other muscle fiber areas.

447 Finally, like AChR pre patterning, early axial motor axon outgrowth is confined to the center of the  
448 myotome and navigating growth cones contact prepatterned AChR clusters that form in this region.  
449 Similar to the trunk (Panzer et al., 2006), our developmental timepoints suggest that early extending  
450 axons selectively grow towards prepatterned muscle regions. Yet beyond the prepatterned region,



451 axons in the pectoral fin form intricate patterns across muscle fibers. This growth pattern is more similar  
452 to later axon outgrowth in the trunk in which motor axons branch to innervate fast muscle fibers deep  
453 in the myotome (Beattie, 2000). These differences in prepatterning and axon outgrowth may be a  
454 consequence of the anatomy of the pectoral fin, in which axons converge at a dorsal or ventral plexus  
455 prior to topographically innervating longitudinal muscle fibers. Indeed, pectoral fin neuroanatomy is  
456 similar to that of the muscles of tetrapod forelimbs, in which axons sort at the brachial plexus to  
457 innervate distinct muscles. While we identify a conserved requirement for MuSK to establish  
458 prepatterning across muscles, these key anatomical and developmental differences between  
459 appendicular and axial muscles indicate that the signals that determine the location of AChR  
460 prepatterning and direct axon pathfinding are differentially regulated in appendicular muscle, leading to  
461 open questions regarding additional molecular mechanisms and pathway components that orchestrate  
462 NMJ development selectively in appendicular muscle.

### 463 **A dual role for Agrin/Lrp4 signaling in appendicular neuromuscular synapse development**

464 Consistent with previous work, we find that loss of Agrin and Lrp4 leads to a significant reduction of  
465 neural AChR clusters on appendicular muscle fibers, demonstrating a critical and conserved role for  
466 both genes in promoting the formation these synaptic AChR clusters (Fig. 5C, Fig. 6D). Examining  
467 *agrin/lrp4* mutants as well as nerve-deprived pectoral fins revealed evidence for a previously  
468 unappreciated role for Agrin/Lrp4 signaling. While fins lacking Agrin or Lrp4 display reduced number of  
469 neural AChR clusters, the clusters that form are significantly enlarged in their median size, over 4-fold  
470 in *agrin* mutants (Fig. 5D). Strikingly, without Agrin or Lrp4, the giant AChR giant clusters can be  
471 partially suppressed by depleting *musk*. A developmental timecourse suggests these giant clusters are  
472 derived from MuSK-dependent prepatterned AChR clusters that expand over time. Combined our  
473 findings strongly support the idea that Agrin and Lrp4 play a dual role to both promote the formation of  
474 axon-induced AChR clusters and unexpectedly, to constrain Agrin-independent MuSK activity thereby  
475 restricting the growth and development of initial aneural clusters into synapse-associated AChR  
476 clusters. Future studies will be necessary to identify the downstream signaling events that allow  
477 Agrin/Lrp4 signaling to simultaneously potentiate and attenuate MuSK signaling in appendicular muscle  
478 at different regions on the same muscle fiber.

### 479 **Presynaptic axon patterning in appendicular muscle**

480 Navigating growth cones respond to local extrinsic cues to determine where to form a synapse. This  
481 'stop signal' requires MuSK signaling, as *musk* mutants in mouse and fish have an overgrown,  
482 defasciculated axon pattern (DeChiara et al., 1996; Zhang et al., 2004; Kim and Burden, 2008). In the

zebrafish, this axon patterning role for MuSK is independent of AChR clustering, as *rapsyn* mutants that lack clustered AChRs have normal axon patterning (Zhang et al., 2004; Gribble et al., 2018) (Fig. S2). Thus, MuSK independently clusters AChRs postsynaptically and regulates axon patterning presynaptically, although the mechanism is poorly understood. Unexpectedly, we find that in the pectoral fin the presynaptic consequence of *agrln* or *lrp4* loss is for multiple axons to form mature synapses in apposition to postsynaptic AChR giant clusters, suggesting an overactive ‘stop signal’ in these regions. These giant cluster regions likely represent ‘islands’ of enhanced MuSK activity, as depletion of *musk* suppresses the formation of presynaptic swellings. Taken together, these results suggest that Lrp4 signaling, induced by the arrival of axonally released Agrin, may inhibit the MuSK-dependent ‘stop signal’ in the appendicular muscle of the pectoral fin. Such a mechanism could be a way to signal to new waves of navigating growth cones that this synaptic region is occupied.

Our data demonstrate that MuSK plays distinct roles to establish both the presynaptic axonal pattern and postsynaptic AChR clusters, but that both processes are constrained by Agrin/Lrp4 signaling within appendicular muscle. One attractive candidate for how MuSK might influence neuromuscular synapse development in an Agrin/Lrp4-dependent manner is through Wnt signaling. MuSK can bind Wnts through its extracellular cysteine-rich domain (CRD) (Jing et al., 2009; Strochlic et al., 2012; Zhang et al., 2012b). Indeed, in the zebrafish trunk, Wnt4a and Wnt11r binding through the MuSK CRD are required for AChR prepatterning and axon guidance (Jing et al., 2009; Gordon et al., 2012). While a functional role for Wnt:MuSK signaling to establish prepatterning in mouse is more controversial (Messéant et al., 2015; Remédio et al., 2016), in mammals Wnt proteins do regulate both AChR clustering (Strochlic et al., 2012; Zhang et al., 2012a) and axon guidance (reviewed in Zou, 2004). Interestingly, as the MuSK CRD domain can adopt two distinct conformations with differential abilities to bind Wnts (Stiegler et al., 2006), Guarino *et al.* speculate that Agrin/Lrp4 binding to MuSK can promote a conformational change to make MuSK unable to bind Wnts thereby shifting downstream MuSK signaling (Guarino et al., 2020). Therefore, it is tempting to speculate that in the pectoral fin prior to axon innervation, MuSK:Wnt signaling promotes both prepatterning of AChRs and local ECM cues to ‘catch’ navigating growth cones at future synaptic sites, perhaps through noncanonical Wnt signaling (Jing et al., 2009). Once the axon arrives, it releases Agrin, which binds Lrp4 on the muscle membrane and induces a conformational change in MuSK such that it can no longer bind Wnts. Thus, via competition through binding, Agrin/Lrp4 could locally constrain MuSK signaling. An outstanding question is why Agrin/Lrp4 regulate MuSK signaling differently between axial and appendicular muscle. As there are 23 Wnts in the zebrafish genome (Lu et al., 2011) with dynamic and differential expression throughout larval development, perhaps the relevant Wnt ligand is expressed in the pectoral fin but not in the trunk. Of course, there are many additional proteins that interact directly or indirectly with Agrin,

Lrp4, or MuSK to influence synaptic development. Independently of the underlying mechanism, our results uncover a novel role for Agrin/Lrp4 signaling to constrain MuSK activity in appendicular muscle. The noncanonical nature of our findings reveal that there is diversity in the molecular pathways that mediate neuromuscular synapse development and validate the application of the larval zebrafish pectoral fin to study these processes beyond axial muscle.

## METHODS

### Zebrafish strains and animal care

Protocols and procedures involving zebrafish (*Danio rerio*) are in compliance with the University of Pennsylvania Institutional Animal Care and Use Committee regulations. All transgenic lines were maintained in the Tübingen or Tupfel long fin genetic background and raised as previously described (Mullins et al., 1994). The following transgenic lines were used: *Tg(mnx1:GFP)<sup>ml2</sup>* (Flanagan-Steet et al., 2005), *Tg( $\alpha$ -actin:Lrp4-GFP)<sup>p159Tg</sup>* (Gribble et al., 2018), *Tg(Xla.Tubb:DsRed)<sup>zf148</sup>* (Peri and Nüsslein-Volhard, 2008), *Gt(dmd-citrine)<sup>ct90a</sup>* (a kind gift from Dr. Sharon Amacher) (Ruf-Zamojski et al., 2015), and *Tg( $\alpha$ -actin:GFP)* (Higashijima et al., 1997). The following mutant strains were used: *agrin<sup>p168</sup>* (Gribble et al., 2018), *lrp4<sup>p184</sup>* (Remédio et al., 2016), *lrp4<sup>mi36</sup>* (Saint-Amant et al., 2008), *muskl<sup>tb72</sup>* (Granato et al., 1996; Zhang et al., 2004), and *rapsyn(two<sup>th26</sup>)* (Ono et al., 2002). Homozygous mutants for these genes can be phenotyped at ~36 hpf as they all display motor defects when prodded with a probe. The *lrp4<sup>p184</sup>*, *two<sup>th26</sup>*, and *agrin<sup>p168</sup>* alleles were genotyped using Kompetitive Allele Specific PCR (KASP, LGC Biosearch Technologies). Animals were staged as previously published (Grandel and Schulte-Merker, 1998; Kimmel et al., 1995). As our experiments in larval zebrafish occur prior to sex determination, sex was not a biological variable (Kossack and Draper, 2019).

### Whole-mount immunohistochemistry and imaging

Zebrafish embryos or larvae immobilized with tricaine (MS-222) and then were fixed for 1 hour at room temperature in sweet fix (4% paraformaldehyde with 125mM sucrose in PBS) plus 0.1% Triton X-100 (Fisher, BP151). Animals were washed in phosphate buffer and incubated overnight at 4°C in primary chicken anti-GFP antibody (1:2000, Aves labs, GFP-1010) or mouse anti-Znp-1 (1:200, Developmental Studies Hybridoma Bank) in incubation buffer (2 mg/mL BSA, 0.5% Triton X-100, 1% NGS). After washing in phosphate buffer, animals were incubated overnight at 4°C in Alexa Fluor 488 donkey anti-chicken secondary antibody (1:1000, Jackson ImmunoResearch, 703-545-155), Alexa Fluor 594 goat anti-mouse secondary antibody (1:1000, Invitrogen, A-21125) and/or alpha-bungarotoxin Alexa Fluor 594 (1:500, Molecular Probes, B-13423) in incubation buffer. Animals were mounted in agarose in a

549 glass-bottomed dish and imaged in 1.5  $\mu\text{m}$  slices using a x40 or x63 water immersion lens on a Zeiss  
550 LSM880 confocal microscope using Zen software (Fig. 2C and 8) or a x40 water immersion lens on an  
551 ix81 Olympus spinning disk confocal microscope using Slidebook Software.

### 552 553 Sparse neuronal labeling

554 A DNA vector encoding *mnx1:mKate* was injected as previously described (Gribble et al., 2018;  
555 Thermes et al., 2002) into one-cell-stage embryos. Embryos were screened at 1 dpf for larvae  
556 expressing mKate sparsely in the anterior spinal cord. At 5dpf, animals were mounted in agarose and  
557 imaged live at x40 on an Olympus spinning disk confocal if they had sparse mKate-expressing axons  
558 innervating the pectoral fin.

### 559 560 Timelapse imaging

561 Embryos expressing both  *$\alpha$ -actin:GFP* and *Xla.Tubb:DsRed* were anesthetized with tricaine and  
562 mounted in agarose around 35hpf. Animals were timelapsed using a 40x lense on an ix81 Olympus  
563 spinning disk confocal in a temperature chamber set to 28°C as previously described (Rosenberg et  
564 al., 2012). Stacks through the developing fin bud were captured in 1.5  $\mu\text{m}$  slices with 30 minute  
565 intervals. Animals were imaged continuously for up to 3 days, with some adjustments to account for  
566 drifting and the pectoral fin moving out of frame.

### 567 568 Motor neuron ablation

569 *mnx1:GFP* animals were mounted in agarose and motor neurons from spinal cord segments 3-5 were  
570 ablated using an Ablate! 532 nm attenuable pulse laser (Intelligent Imaging Innovations (3I), Denver,  
571 CO) beginning at 2 dpf, prior to axons innervating the pectoral fin bud. Neurons were considered  
572 ablated when there were no GFP+ cell bodies present in the ablated spinal cord region and axons  
573 showed signs of fragmentation. Neurons were re-ablated at 3 dpf to ensure any regenerated motor  
574 neurons in the spinal cord did not innervate the fin. Fins were visually inspected to confirm absence of  
575 GFP+ motor axon signal within the denervated region of the fin. Animals were fixed and stained with  
576 alpha-bungarotoxin at 5 dpf.

### 577 578 Image processing and quantification

579 To simplify data visualization and quantification, signal from the abductor or adductor innervation of  
580 was manually separated from stacks through pectoral fins. Individual channel image stacks were  
581 opened in Fiji (Schindelin et al., 2012), background subtracted, channels were merged, and the image  
582 was changed to RGB. Stacks were visualized using the 3D viewer plugin and rotated to a top-down

583 view so the separation between abductor and adductor innervation was distinct. Axon signal from the  
584 opposite innervation field and other fluorescent signal from the larval body wall was selected and filled,  
585 resulting in the corresponding region filled with black on the RGB stack. Any residual signal from the  
586 opposing innervation field or trunk was removed directly on the RGB stack. This resulted in signal  
587 specific to the abductor or adductor muscles, as specified. Stacks were converted to maximum  
588 projections. For quantification of  $\alpha$ -Btx puncta, a custom CellProfiler (Lamprecht et al., 2007) pipeline  
589 was created to detect and measure the area of  $\alpha$ -Btx punta per fin. Mutants that do not form distinct  $\alpha$ -  
590 Btx puncta (*musk* and *rapsyn*) could not be quantified using CellProfiler pipelines. Fin images were  
591 excluded from analysis if the maximum projection did not include the whole fin, the fin was damaged  
592 or abnormally small, or if measurements were clear outliers from other fins of the same genotype in the  
593 dataset. All figures show only abductor innervation except for early developmental stages in figures 2  
594 and 7, which are a maximum projection of the entire pectoral fin bud or where otherwise noted.

### 595 596 Statistical analysis

597 Data were imported into Graphpad Prism for statistical analysis. Groups were compared using an  
598 unpaired t-test or one-way ANOVA with either Dunnett's or Sidak's multiple comparisons tests. For  
599 histogram of cluster sizes, the area of all AChR clusters measured in each genotype were pooled and  
600 binned into 5  $\mu\text{m}^2$  bins, with any cluster over 20  $\mu\text{m}^2$  included in the same bin. Distributions were  
601 compared using a Kruskal-Wallis test with Dunn's multiple comparisons test. In figures where the  
602 control group is labeled as "siblings" we pooled wild type and heterozygous animals together as there  
603 was no statistical difference between these groups.

### 604 605 **ACKNOWLEDGEMENTS**

606 The authors would like to thank members of the Granato lab, the UPenn zebrafish community, and the  
607 UPenn neurodevelopment group for helpful feedback on data and the manuscript. We would also like  
608 to thank Dr. Jonathan Raper for helpful discussions. Finally, we would like to thank the Penn Sanger  
609 sequencing core for technical support and the Penn Cell and Developmental Biology microscopy core.

### 610 611 **COMPETING INTERESTS**

612 No competing interests declared.



## 615 FUNDING

616 This work was supported by the National Institute of Neurological Disorders And Stroke of the National  
617 Institutes of Health under Award Numbers K01NS119496 (LW), F32 NS103219 (LW), R01NS097914  
618 (MG) and RO1 EY024861 (MG).

## 620 REFERENCES

- 621 **Beattie, C. E.** (2000). Control of motor axon guidance in the zebrafish embryo. *Brain Res. Bull.* **53**,  
622 489–500.
- 623 **Bekoff, A. and Betz, W. J.** (1976). Acetylcholine hot spots: development on myotubes cultured from  
624 aneural limb buds. *Science* **193**, 915–917.
- 625 **DeChiara, T. M., Bowen, D. C., Valenzuela, D. M., Simmons, M. V., Poueymirou, W. T., Thomas,**  
626 **S., Kinetz, E., Compton, D. L., Rojas, E., Park, J. S., et al.** (1996). The Receptor Tyrosine  
627 Kinase MuSK Is Required for Neuromuscular Junction Formation In Vivo. *Cell* **85**, 501–512.
- 628 **Eisen, J. S., Myers, P. Z. and Westerfield, M.** (1986). Pathway selection by growth cones of  
629 identified motoneurons in live zebra fish embryos. *Nature* **320**, 269–271.
- 630 **Flanagan-Steet, H., Fox, M. A., Meyer, D. and Sanes, J. R.** (2005). Neuromuscular synapses can  
631 form in vivo by incorporation of initially aneural postsynaptic specializations. *Development* **132**,  
632 4471–4481.
- 633 **Gillespie, S. K., Balasubramanian, S., Fung, E. T. and Huganir, R. L.** (1996). Rapsyn clusters and  
634 activates the synapse-specific receptor tyrosine kinase MuSK. *Neuron* **16**, 953–962.
- 635 **Gordon, L. R., Gribble, K. D., Syrett, C. M. and Granato, M.** (2012). Initiation of synapse formation  
636 by Wnt-induced MuSK endocytosis. *Dev. Camb. Engl.* **139**, 1023–1033.
- 637 **Granato, M., Eeden, F. J. van, Schach, U., Trowe, T., Brand, M., Furutani-Seiki, M., Haffter, P.,**  
638 **Hammerschmidt, M., Heisenberg, C. P., Jiang, Y. J., et al.** (1996). Genes controlling and  
639 mediating locomotion behavior of the zebrafish embryo and larva. *Development* **123**, 399–413.
- 640 **Grandel, H. and Schulte-Merker, S.** (1998). The development of the paired fins in the Zebrafish  
641 (*Danio rerio*). *Mech. Dev.* **79**, 99–120.
- 642 **Gribble, K. D., Walker, L. J., Saint-Amant, L., Kuwada, J. Y. and Granato, M.** (2018). The synaptic  
643 receptor Lrp4 promotes peripheral nerve regeneration. *Nat. Commun.* **9**, 2389.
- 644 **Guarino, S. R., Canciani, A. and Forneris, F.** (2020). Dissecting the Extracellular Complexity of  
645 Neuromuscular Junction Organizers. *Front. Mol. Biosci.* **6**,.
- 646 **Higashijima, S., Okamoto, H., Ueno, N., Hotta, Y. and Eguchi, G.** (1997). High-frequency  
647 generation of transgenic zebrafish which reliably express GFP in whole muscles or the whole  
648 body by using promoters of zebrafish origin. *Dev. Biol.* **192**, 289–299.
- 649 **Jing, L., Lefebvre, J. L., Gordon, L. R. and Granato, M.** (2009). Wnt signals organize synaptic  
650 prepattern and axon guidance through the zebrafish unplugged/MuSK receptor. *Neuron* **61**,  
651 721–733.



- 652 **Jing, L., Gordon, L. R., Shtibin, E. and Granato, M.** (2010). Temporal and spatial requirements of  
653 unplugged/MuSK function during zebrafish neuromuscular development. *PLoS One* **5**, e8843.
- 654 **Kim, N. and Burden, S. J.** (2008). MuSK controls where motor axons grow and form synapses. *Nat.*  
655 *Neurosci.* **11**, 19–27.
- 656 **Kim, N., Stiegler, A. L., Cameron, T. O., Hallock, P. T., Gomez, A. M., Huang, J. H., Hubbard, S.**  
657 **R., Dustin, M. L. and Burden, S. J.** (2008). Lrp4 is a receptor for Agrin and forms a complex  
658 with MuSK. *Cell* **135**, 334–342.
- 659 **Kimmel, C. B., Ballard, W. W., Kimmel, S. R., Ullmann, B. and Schilling, T. F.** (1995). Stages of  
660 embryonic development of the zebrafish. *Dev. Dyn. Off. Publ. Am. Assoc. Anat.* **203**, 253–310.
- 661 **Kossack, M. E. and Draper, B. W.** (2019). Genetic regulation of sex determination and maintenance  
662 in zebrafish (*Danio rerio*). *Curr. Top. Dev. Biol.* **134**, 119–149.
- 663 **Lamprecht, M. R., Sabatini, D. M. and Carpenter, A. E.** (2007). CellProfiler: free, versatile software  
664 for automated biological image analysis. *BioTechniques* **42**, 71–75.
- 665 **Lefebvre, J. L., Jing, L., Becaficco, S., Franzini-Armstrong, C. and Granato, M.** (2007).  
666 Differential requirement for MuSK and dystroglycan in generating patterns of neuromuscular  
667 innervation. *Proc. Natl. Acad. Sci. U. S. A.* **104**, 2483–2488.
- 668 **Lin, W., Burgess, R. W., Dominguez, B., Pfaff, S. L., Sanes, J. R. and Lee, K.-F.** (2001). Distinct  
669 roles of nerve and muscle in postsynaptic differentiation of the neuromuscular synapse. *Nature*  
670 **410**, 1057–1064.
- 671 **Lu, F.-I., Thisse, C. and Thisse, B.** (2011). Identification and mechanism of regulation of the  
672 zebrafish dorsal determinant. *Proc. Natl. Acad. Sci.* **108**, 15876–15880.
- 673 **Mercader, N.** (2007). Early steps of paired fin development in zebrafish compared with tetrapod limb  
674 development. *Dev. Growth Differ.* **49**, 421–437.
- 675 **Messéant, J., Dobbertin, A., Girard, E., Delers, P., Manuel, M., Mangione, F., Schmitt, A.,**  
676 **Denmat, D. L., Molgó, J., Zytnicki, D., et al.** (2015). MuSK Frizzled-Like Domain Is Critical for  
677 Mammalian Neuromuscular Junction Formation and Maintenance. *J. Neurosci.* **35**, 4926–  
678 4941.
- 679 **Moody-Corbett, F. and Cohen, M. W.** (1982). Influence of nerve on the formation and survival of  
680 acetylcholine receptor and cholinesterase patches on embryonic *Xenopus* muscle cells in  
681 culture. *J. Neurosci.* **2**, 633–646.
- 682 **Mullins, M. C., Hammerschmidt, M., Haffter, P. and Nüsslein-Volhard, C.** (1994). Large-scale  
683 mutagenesis in the zebrafish: in search of genes controlling development in a vertebrate. *Curr.*  
684 *Biol. CB* **4**, 189–202.
- 685 **Myers, P. Z.** (1985). Spinal motoneurons of the larval zebrafish. *J. Comp. Neurol.* **236**, 555–561.
- 686 **Ono, F., Shcherbatko, A., Higashijima, S., Mandel, G. and Brehm, P.** (2002). The Zebrafish  
687 motility mutant twitch once reveals new roles for rapsyn in synaptic function. *J. Neurosci. Off.*  
688 *J. Soc. Neurosci.* **22**, 6491–6498.

- 689 **Panzer, J. A., Song, Y. and Balice-Gordon, R. J.** (2006). In Vivo Imaging of Preferential Motor Axon  
690 Outgrowth to and Synaptogenesis at Prepatterned Acetylcholine Receptor Clusters in  
691 Embryonic Zebrafish Skeletal Muscle. *J. Neurosci.* **26**, 934–947.
- 692 **Peng, H. B.** (1986). Elimination of preexistent acetylcholine receptor clusters induced by the  
693 formation of new clusters in the absence of nerve. *J. Neurosci.* **6**, 581–589.
- 694 **Peri, F. and Nüsslein-Volhard, C.** (2008). Live Imaging of Neuronal Degradation by Microglia  
695 Reveals a Role for v0-ATPase a1 in Phagosomal Fusion In Vivo. *Cell* **133**, 916–927.
- 696 **Remédio, L., Gribble, K. D., Lee, J. K., Kim, N., Hallock, P. T., Delestrée, N., Mentis, G. Z.,**  
697 **Froemke, R. C., Granato, M. and Burden, S. J.** (2016). Diverging roles for Lrp4 and Wnt  
698 signaling in neuromuscular synapse development during evolution. *Genes Dev.* **30**, 1058–  
699 1069.
- 700 **Rosenberg, A. F., Wolman, M. A., Franzini-Armstrong, C. and Granato, M.** (2012). In vivo nerve-  
701 macrophage interactions following peripheral nerve injury. *J. Neurosci. Off. J. Soc. Neurosci.*  
702 **32**, 3898–3909.
- 703 **Ruf-Zamojski, F., Trivedi, V., Fraser, S. E. and Trinh, L. A.** (2015). Spatio-Temporal Differences in  
704 Dystrophin Dynamics at mRNA and Protein Levels Revealed by a Novel FlipTrap Line. *PLOS*  
705 *ONE* **10**, e0128944.
- 706 **Saint-Amant, L., Sprague, S. M., Hirata, H., Li, Q., Cui, W. W., Zhou, W., Poudou, O., Hume, R. I.**  
707 **and Kuwada, J. Y.** (2008). The zebrafish ennui behavioral mutation disrupts acetylcholine  
708 receptor localization and motor axon stability. *Dev. Neurobiol.* **68**, 45–61.
- 709 **Schindelin, J., Arganda-Carreras, I., Frise, E., Kaynig, V., Longair, M., Pietzsch, T., Preibisch,**  
710 **S., Rueden, C., Saalfeld, S., Schmid, B., et al.** (2012). Fiji: an open-source platform for  
711 biological-image analysis. *Nat. Methods* **9**, 676–682.
- 712 **Siomava, N., Shkil, F., Voronezhskaya, E. and Diogo, R.** (2018). Development of zebrafish paired  
713 and median fin musculature: basis for comparative, developmental, and macroevolutionary  
714 studies. *Sci. Rep.* **8**, 14187.
- 715 **Stiegler, A. L., Burden, S. J. and Hubbard, S. R.** (2006). Crystal Structure of the Agrin-responsive  
716 Immunoglobulin-like Domains 1 and 2 of the Receptor Tyrosine Kinase MuSK. *J. Mol. Biol.*  
717 **364**, 424–433.
- 718 **Strochlic, L., Falk, J., Goillot, E., Sigoillot, S., Bourgeois, F., Delers, P., Rouvière, J., Swain, A.,**  
719 **Castellani, V., Schaeffer, L., et al.** (2012). Wnt4 Participates in the Formation of Vertebrate  
720 Neuromuscular Junction. *PLoS ONE* **7**,.
- 721 **Thermes, V., Grabher, C., Ristoratore, F., Bourrat, F., Choulika, A., Wittbrodt, J. and Joly, J.-S.**  
722 (2002). I-SceI meganuclease mediates highly efficient transgenesis in fish. *Mech. Dev.* **118**,  
723 91–98.
- 724 **Thorsen, D. H. and Hale, M. E.** (2007). Neural development of the zebrafish (*Danio rerio*) pectoral  
725 fin. *J. Comp. Neurol.* **504**, 168–184.
- 726 **Thorsen, D. H., Cassidy, J. J. and Hale, M. E.** (2004). Swimming of larval zebrafish: fin–axis  
727 coordination and implications for function and neural control. *J. Exp. Biol.* **207**, 4175–4183.

- 728 **Uemura, Y., Kato, K., Kawakami, K., Kimura, Y., Oda, Y. and Higashijima, S.** (2020). Neuronal  
729 Circuits That Control Rhythmic Pectoral Fin Movements in Zebrafish. *J. Neurosci.* **40**, 6678–  
730 6690.
- 731 **Yang, X., Arber, S., William, C., Li, L., Tanabe, Y., Jessell, T. M., Birchmeier, C. and Burden, S.**  
732 **J.** (2001). Patterning of muscle acetylcholine receptor gene expression in the absence of  
733 motor innervation. *Neuron* **30**, 399–410.
- 734 **Yano, T., Abe, G., Yokoyama, H., Kawakami, K. and Tamura, K.** (2012). Mechanism of pectoral fin  
735 outgrowth in zebrafish development. *Development* **139**, 2916–2925.
- 736 **Zhang, J., Lefebvre, J. L., Zhao, S. and Granato, M.** (2004). Zebrafish unplugged reveals a role for  
737 muscle-specific kinase homologs in axonal pathway choice. *Nat. Neurosci.* **7**, 1303–1309.
- 738 **Zhang, B., Luo, S., Wang, Q., Suzuki, T., Xiong, W. C. and Mei, L.** (2008). LRP4 serves as a  
739 coreceptor of agrin. *Neuron* **60**, 285–297.
- 740 **Zhang, B., Liang, C., Bates, R., Yin, Y., Xiong, W.-C. and Mei, L.** (2012a). Wnt proteins regulate  
741 acetylcholine receptor clustering in muscle cells. *Mol. Brain* **5**, 7.
- 742 **Zhang, B., Liang, C., Bates, R., Yin, Y., Xiong, W.-C. and Mei, L.** (2012b). Wnt proteins regulate  
743 acetylcholine receptor clustering in muscle cells. *Mol. Brain* **5**, 7.
- 744 **Zong, Y., Zhang, B., Gu, S., Lee, K., Zhou, J., Yao, G., Figueiredo, D., Perry, K., Mei, L. and Jin,**  
745 **R.** (2012). Structural basis of agrin–LRP4–MuSK signaling. *Genes Dev.* **26**, 247–258.
- 746 **Zou, Y.** (2004). Wnt signaling in axon guidance. *Trends Neurosci.* **27**, 528–532.

747

## 748 **FIGURE LEGENDS**

749 **Figure 1: Pectoral fin anatomy.** A) Schematic of 120 hour post fertilization (hpf; 5 days post  
750 fertilization) zebrafish larvae. Anterior (A) is to the left, dorsal (D) is up. B) Schematic of pectoral fin  
751 motor neuron innervation. Motor neuron cell bodies are in the anterior four segments of the spinal  
752 cord (SC). Nerves 1-3 enter the fin at the dorsal plexus (DP) while nerve 4 enters the fin at the ventral  
753 plexus (VP). All nerves innervate both the abductor (Ab) and adductor (Ad) muscles. C) Abductor  
754 innervation of 120 hpf *Tg(α-actin:GFP);Tg(Xla.Tubb:DsRed)* pectoral fin stained with α-bungarotoxin  
755 to visualize muscle fibers, axons, and acetylcholine receptors (AChRs), respectively. n = 7. D)  
756 Maximum projection of *Tg(mnx1:GFP)* axon innervation in pectoral fin. Abductor (green) and adductor  
757 (magenta) innervation patterns are pseudo-colored. E) Abductor innervation alone F) Abductor  
758 innervation with AChRs labeled with α-bungarotoxin G) AChR labeling alone. n > 77 wildtype pectoral  
759 fins for D-G. H) Cross-section of pectoral fin at approximate region marked by arrow in D. Asterisk  
760 marks endoskeletal disk that separates the two distinct muscles. Scale bars are 25 microns.

761

**Figure 2: Development of pectoral fin innervation.** A) Schematic of zebrafish larvae at 42 hours post fertilization (hpf), high pec stage, and 68 hpf, pec fin stage. Inset highlights motor neurons from spinal cord (SC) segments 1-4 and their corresponding axons projecting to the dorsal plexus (P) to innervate the abductor (Ab) and adductor (Ad) muscles of the pectoral fin. B) Maximum projection stills from timelapse imaging of *Tg( $\alpha$ -actin:GFP);Tg(Xla.Tubb:DsRed)* larvae to label muscles and axons, respectively. Dotted line outlines pectoral fin musculature. Axons converge at a dorsal plexus prior to innervating nascent muscle fibers. As muscle fibers elongate the axonal innervation pattern elaborates. n = 7 wild type animals. Static timepoints of *Tg(mnx1:GFP)* larvae stained with  $\alpha$ -bungarotoxin to label acetylcholine receptors (AChRs). Nerve 4 (4) is labeled. C) At 42 hpf the pectoral fin bud is still lateral to the plexus, so axons and muscles are not yet in the same plane. Asterisk notes developing vasculature that is also labeled by *mnx1:GFP*. D) Axons have just grown past the plexus (adductor axons labeled in double arrowhead). Arrowheads point to aneural AChR clusters. E-G) Abductor innervation only. Axons occupy prepatterned clusters and induce new AChR clusters as they grow throughout the fin. Filled arrowhead points to fin axon branch already associated with AChR clusters. n = 5-10 per timepoint for C-G. Scale bars are 25 microns.

**Figure 3: MuSK is required for pectoral fin neuromuscular synapse development.** A) Schematic of Agrin/Lrp4/MuSK pathway B) Schematic of 120 hpf larval zebrafish. Red boxes outline regions of fin and trunk that were imaged for C-D. Spinal cord (SC). C) Abductor muscle innervation in the pectoral fin from 120 hpf larvae expressing *Tg(mnx1:GFP)* to label motor neurons and stained with  $\alpha$ -bungarotoxin to label acetylcholine receptors (AChRs). *musk* heterozygous sibling pectoral fins exhibit an innervation pattern with numerous small AChR clusters (n = 45/45) while *musk* mutants have an exuberant innervation pattern with diffuse AChR signal throughout muscle fibers in the fin and some focal AChR clusters (n= 25/25). D) Trunk innervation from the same animals shown in C. *musk* mutants form fewer and smaller neuromuscular synapses. All images are maximum intensity projections that include the same number of slices for both genotypes. Scale bars are 25 microns.

**Figure 4: Pectoral fin muscles are predisposed to form large AChR clusters.** A) Motor neuron cell bodies from spinal cord (SC) segments 1-3 were laser-ablated at 2 and 3 days post fertilization (dpf) to prevent motor axon innervation of the dorsal pectoral fin. A/P = anterior/posterior, D/V = dorsal/ventral B) Pectoral fins from control *Tg(mnx1:GFP)* larvae stained with  $\alpha$ -bungarotoxin to label acetylcholine receptors (AChRs). C) Pectoral fin in *Tg(mnx1:GFP)* wild-type larvae after motor neuron ablation. The ventral fin was still innervated (outlined region) with input from unablated nerve 4. Non-innervated

dorsal region of the fin has enlarged AChR clusters. N= 3/3 unablated controls, 6/6 wildtype pectoral fins with full or partial ablations at 120 hours post fertilization (5 dpf). Scale bar is 25 microns.

**Figure 5: Agrin is required for correct axon innervation and AChR patterning in the pectoral fin.** A) Trunk innervation in 120 hpf larvae expressing *Tg(mnx1:GFP)* to label motor axons and stained with  $\alpha$ -bungarotoxin to label acetylcholine receptors (AChRs). Trunks in *agrin* mutants form fewer and smaller neuromuscular synapses. B) Abductor muscle innervation in the pectoral fin from the same animals shown in A. *Agrin* sibling animals exhibit an innervation pattern with numerous small AChR clusters while *agrin* mutants have swellings in the innervation pattern directly opposed to enlarged AChR clusters throughout muscle fibers in the fin. Scale bar is 25 microns. Inset from boxed region shows even distribution of small magenta AChR clusters in siblings while mutants have large AChR clusters that colocalize with green axon swellings. Inset scale bar is 10 microns. All images are maximum intensity projections that include the same number of slices for both genotypes. Quantification of the number of AChR clusters per fin (C) and the median cluster size per fin (D). E) Histogram of the distribution of AChR cluster sizes across all fins quantified (5 square micron bins). \*\*\*\*;  $P < 0.0001$ , t-test. n = 23 (siblings), 21 (mutants).

**Figure 6: Lrp4 is required for correct axon innervation and AChR patterning in the pectoral fin.** Abductor muscle innervation in the pectoral fin in 120 hours post fertilization larvae expressing *Tg(mnx1:GFP)* to label motor neurons and stained with  $\alpha$ -bungarotoxin to label acetylcholine receptors (AChRs). A) *Lrp4* sibling animals exhibit innervation patterns with numerous small AChR clusters. B) *Lrp4* mutants exhibit abnormal swellings in the innervation pattern directly opposed to large AChR clusters. C) Expression of *Lrp4-GFP* in muscles of *Lrp4* mutants is sufficient to rescue the mutant innervation pattern. Scale bar is 25 microns. Dotted boxes outline region shown in insets (scale bar of insets is 10 microns). Quantification of the number of AChR clusters per fin (D) and the median cluster size per fin (E). F) Histogram of the distribution of AChR cluster sizes across all animals quantified (5 square micron bins). n = 15 (siblings), 23 (*Lrp4* mutants), 16 (siblings plus *Tg(act:Lrp4-GFP)*), 20 (*Lrp4* mutants plus *Tg(act:Lrp4-GFP)*). G) Sparse labeling of axons injected with *mnx1:mKate*, with all motor axons labeled with *Tg(mnx1:GFP)*. Sparse labeling does not label entire 'swelling' but axon ends appear bulbous, indicating that multiple axons contribute to the abnormal innervation swellings in *Lrp4* mutants. Orange arrowheads point to axon endings. Dotted box outlines insets. n = 11/12 (siblings), 7/7 (mutants) Scale bar is 25 microns. H) Schematic summarizing axonal organization and AChR clusters. ns= not significant, \* $p < 0.05$ , \*\*\*\* $p < 0.0001$ , one way ANOVA with Dunnett's multiple comparisons test.



829

830 **Figure 7: Musk depletion partially suppresses *Irp4* mutant phenotype.** A) *Irp4*<sup>+/-</sup>;*musk*<sup>+/-</sup> trans  
831 heterozygotes have an innervation pattern indistinguishable from wild type while B) *Irp4*;*musk* double  
832 mutants phenocopy *musk* mutants with defasciculated axonal patterning labeled with Tg(*mnx1:GFP*)  
833 and diffuse acetylcholine receptor (AChR) staining as labeled by bungarotoxin. C) *Irp4* mutant motor  
834 axons have swellings in their innervation pattern that are opposed to large AChR clusters. D) While  
835 *Irp4* mutants that are heterozygous for *musk* (*Irp4*<sup>+/-</sup>;*musk*<sup>+/-</sup>) still have some large AChR clusters similar  
836 to *Irp4* mutants (orange arrows), they also have regions of the fin with smaller AChR clusters (orange  
837 dotted region). Quantification of E) the number of AChR clusters per fin, F) the median cluster size per  
838 fin (square microns), and G) the distribution of cluster sizes (5 square micron bins, \*\*\*\*p< 0.001, one-  
839 way Anova with Sidak's (E) or Dunnett's (F) multiple comparisons test. n= 8 (wild type), 21 (*Irp4*<sup>+/-</sup>  
840 ;*musk*<sup>+/-</sup>), 4 (*Irp4*<sup>-/-</sup>;*musk*<sup>-/-</sup>), 33 (*Irp4*<sup>-/-</sup>), 39 (*Irp4*<sup>+/-</sup>;*musk*<sup>+/-</sup>).

841

842 **Figure 8: Agrin restricts presynaptic terminal and neural AChR cluster size.** Developmental  
843 timecourse from Tg(*mnx1:GFP*) larvae to label motor neurons stained with α-bungarotoxin to label  
844 acetylcholine receptors (AChR). A-B). At 46 and 51 hpf, axons growing from the dorsal plexus (P) have  
845 not yet innervated all prepatterned AChR clusters (arrowheads). Asterisks note endothelial or  
846 endoskeletal cells labeled in the green channel. C-E) While small clusters are added as axons grow  
847 into the pectoral fin in sibling animals, clusters mainly increase in size in *agrin* mutants. D) Double arrow  
848 points to presynaptic swelling colocalized with an AChR cluster. Only abductor innervation is shown,  
849 with fin area outlined in dotted white line. Scale bar is 25 microns. G) Schematic summarizing  
850 developmental timecourse. Both siblings and *agrin* mutants look similar during pre patterning stage.  
851 Incoming axons induce small AChR clusters in sibling animals while in *agrin* mutants AChR clusters  
852 and axonal swellings increase in size over time. n= 4-10 animals per genotype per timepoint.

853

854



855 **FIGURES**

856 **Figure 1**

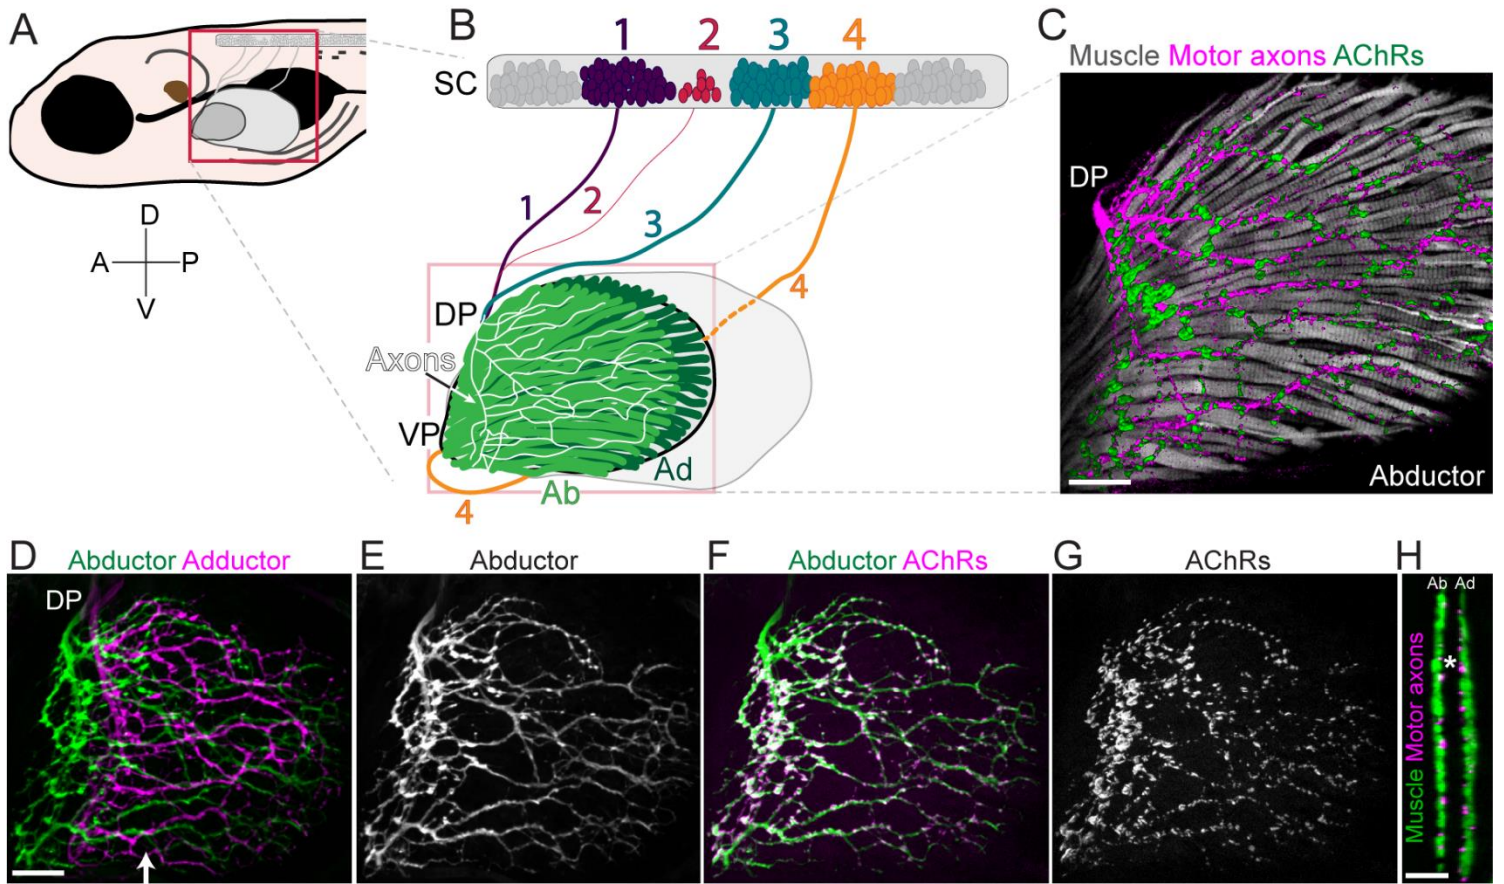

857

858

859

860

## Figure 2

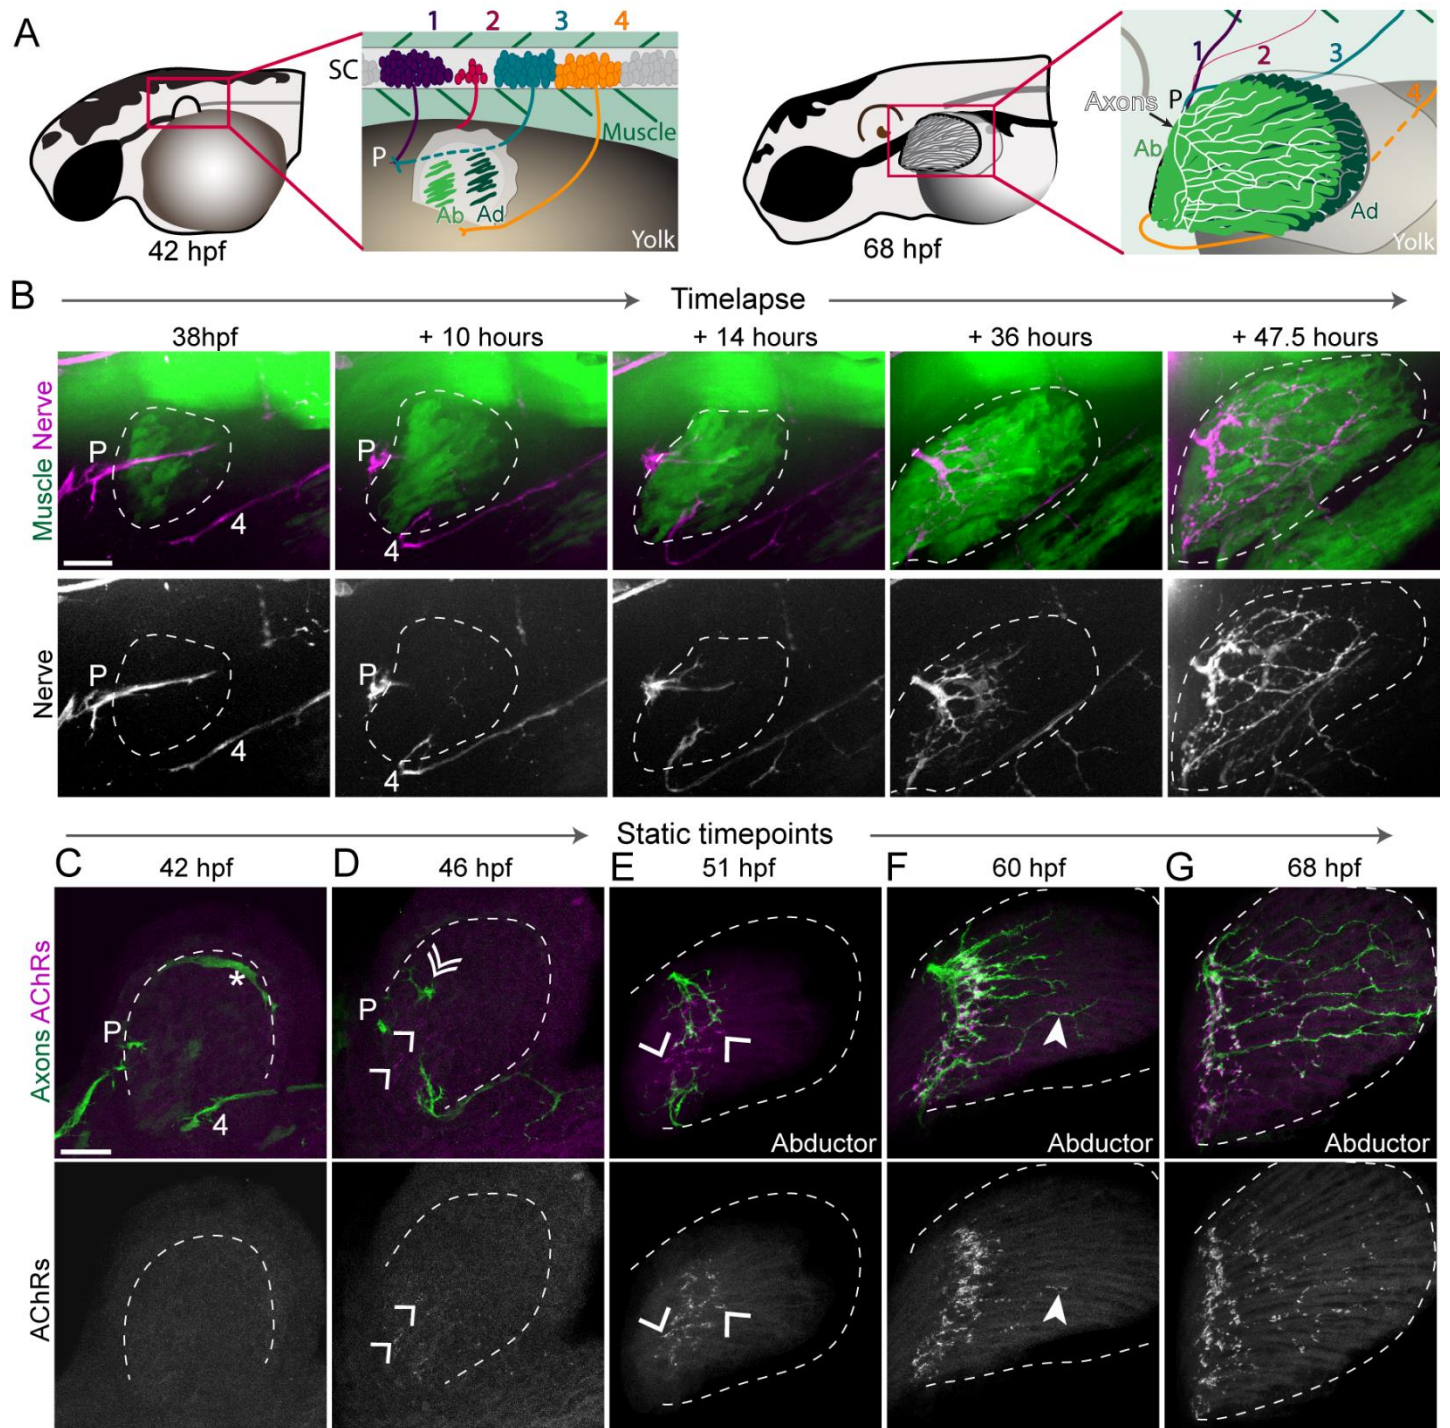

861

862



863

### Figure 3

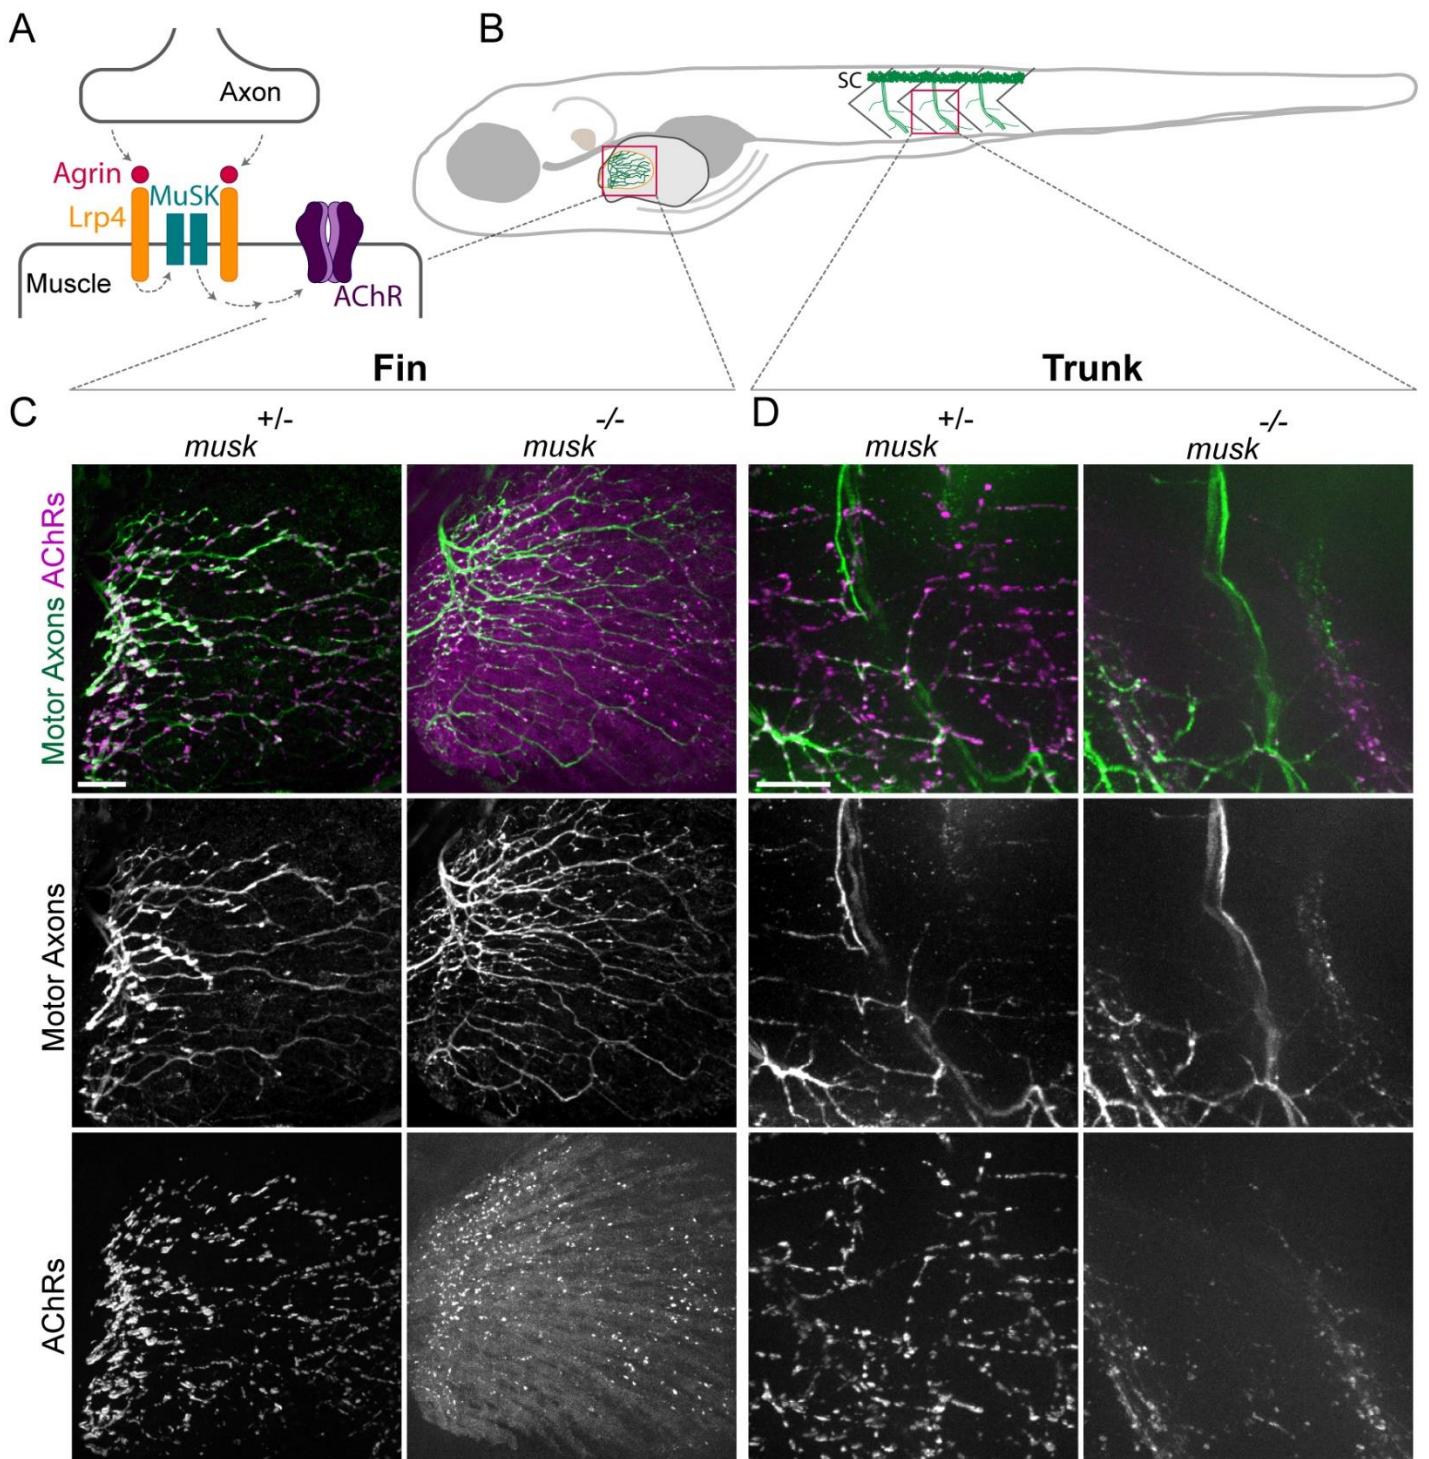

864

865

866

867

## Figure 4

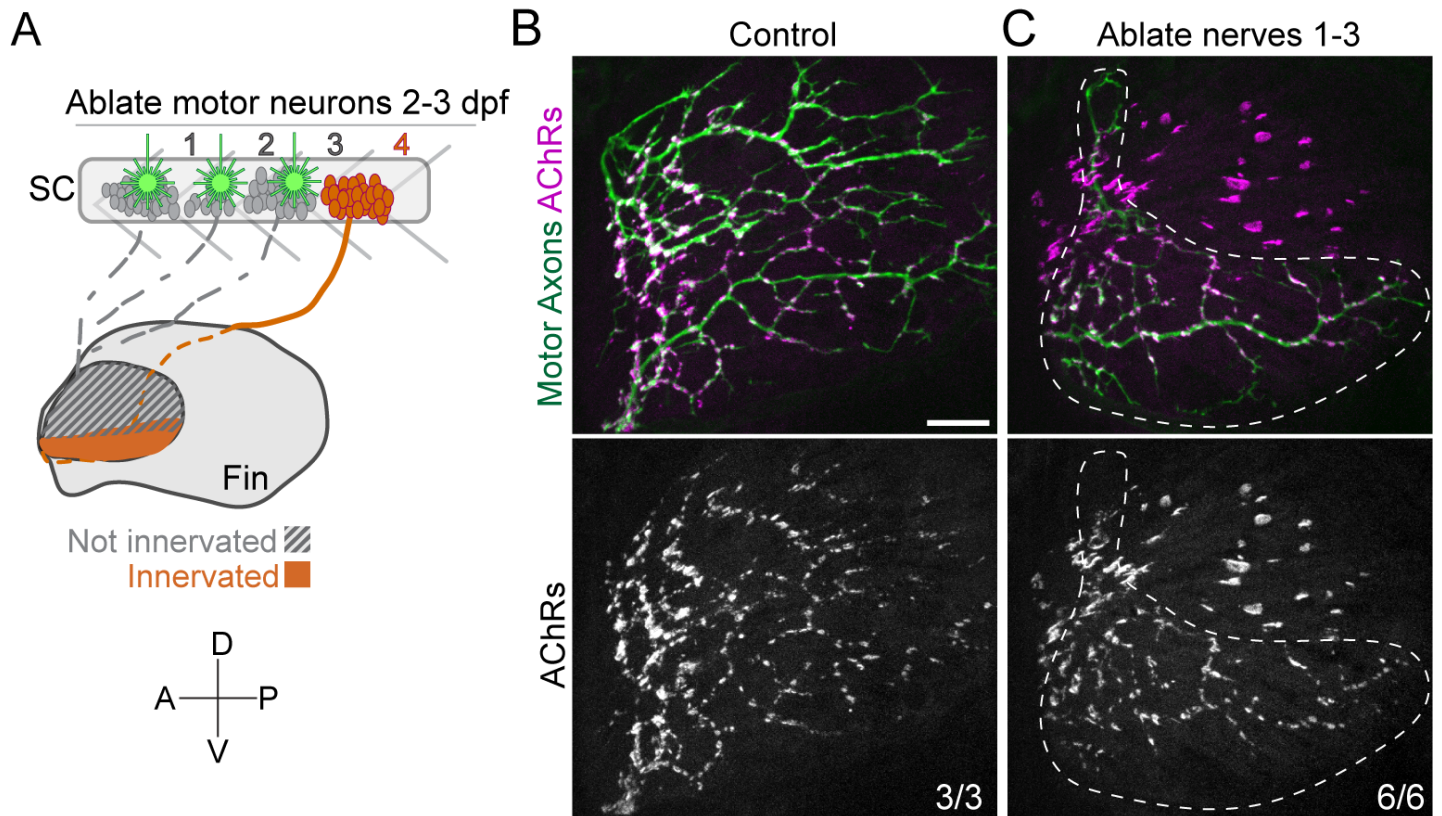

868

869

870



871

**Figure 5**

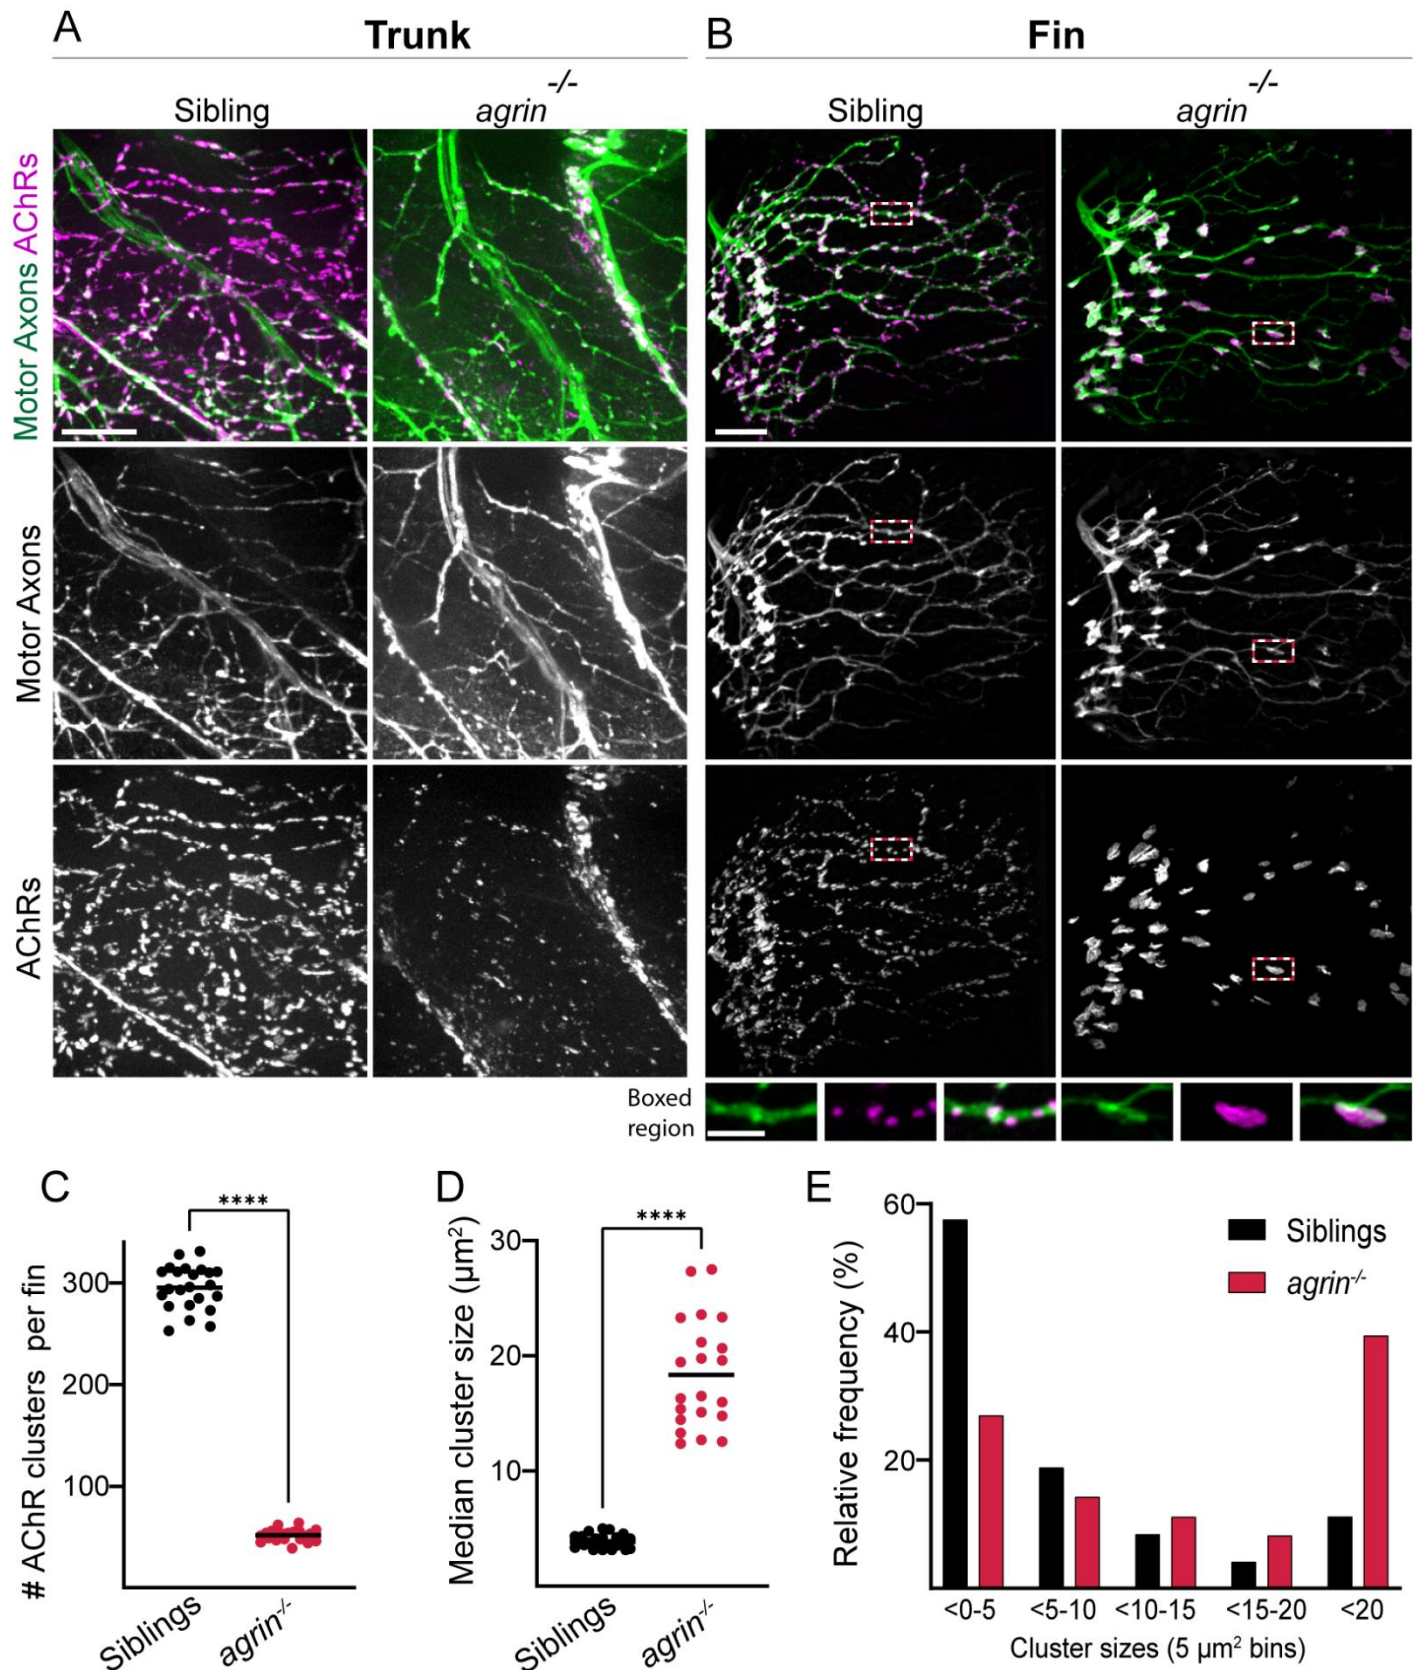

872

873

874

**Figure 6**

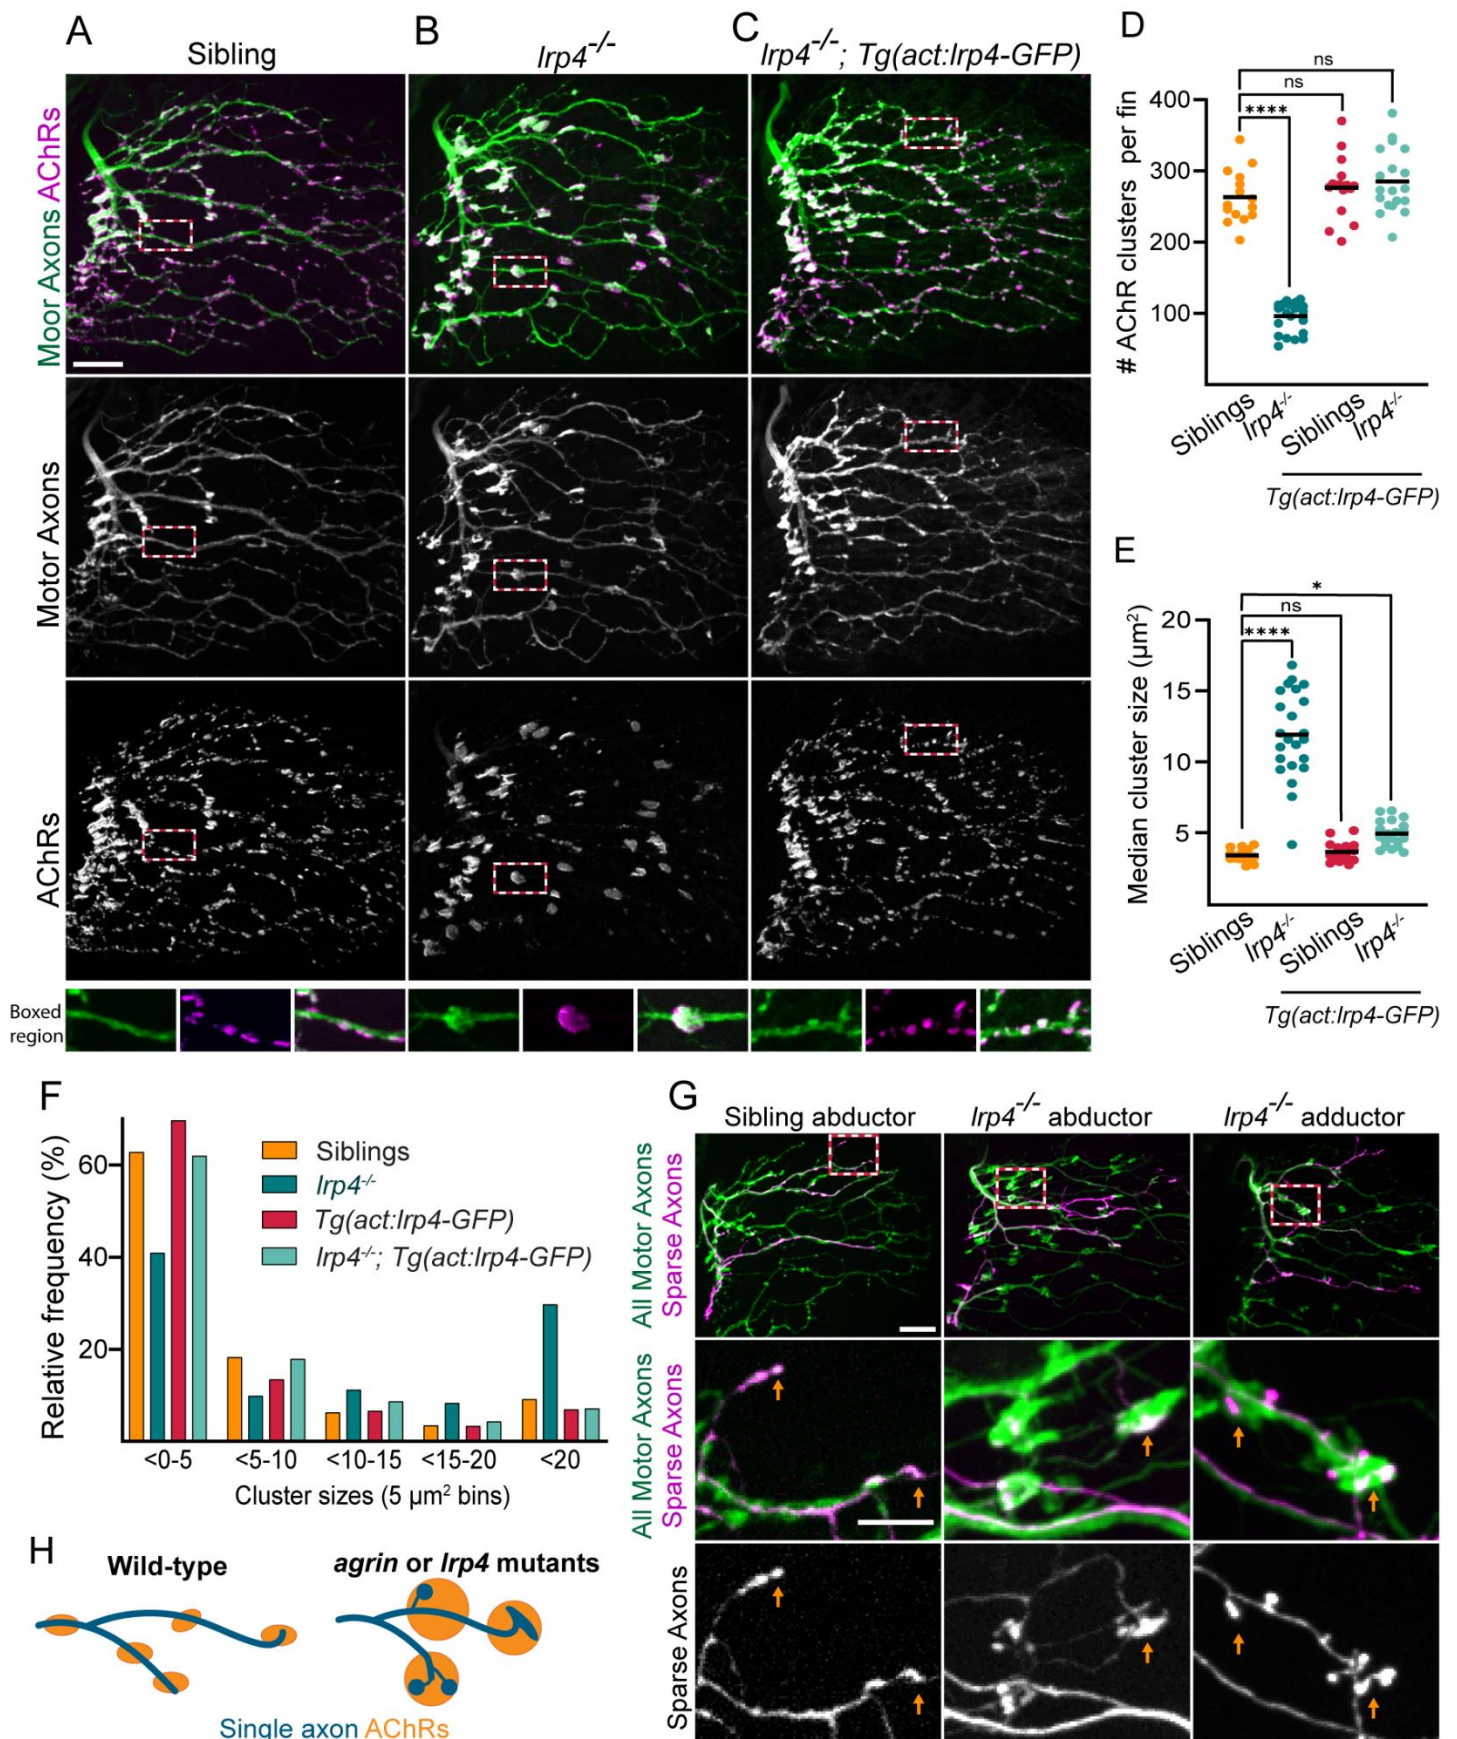

875



876

**Figure 7**

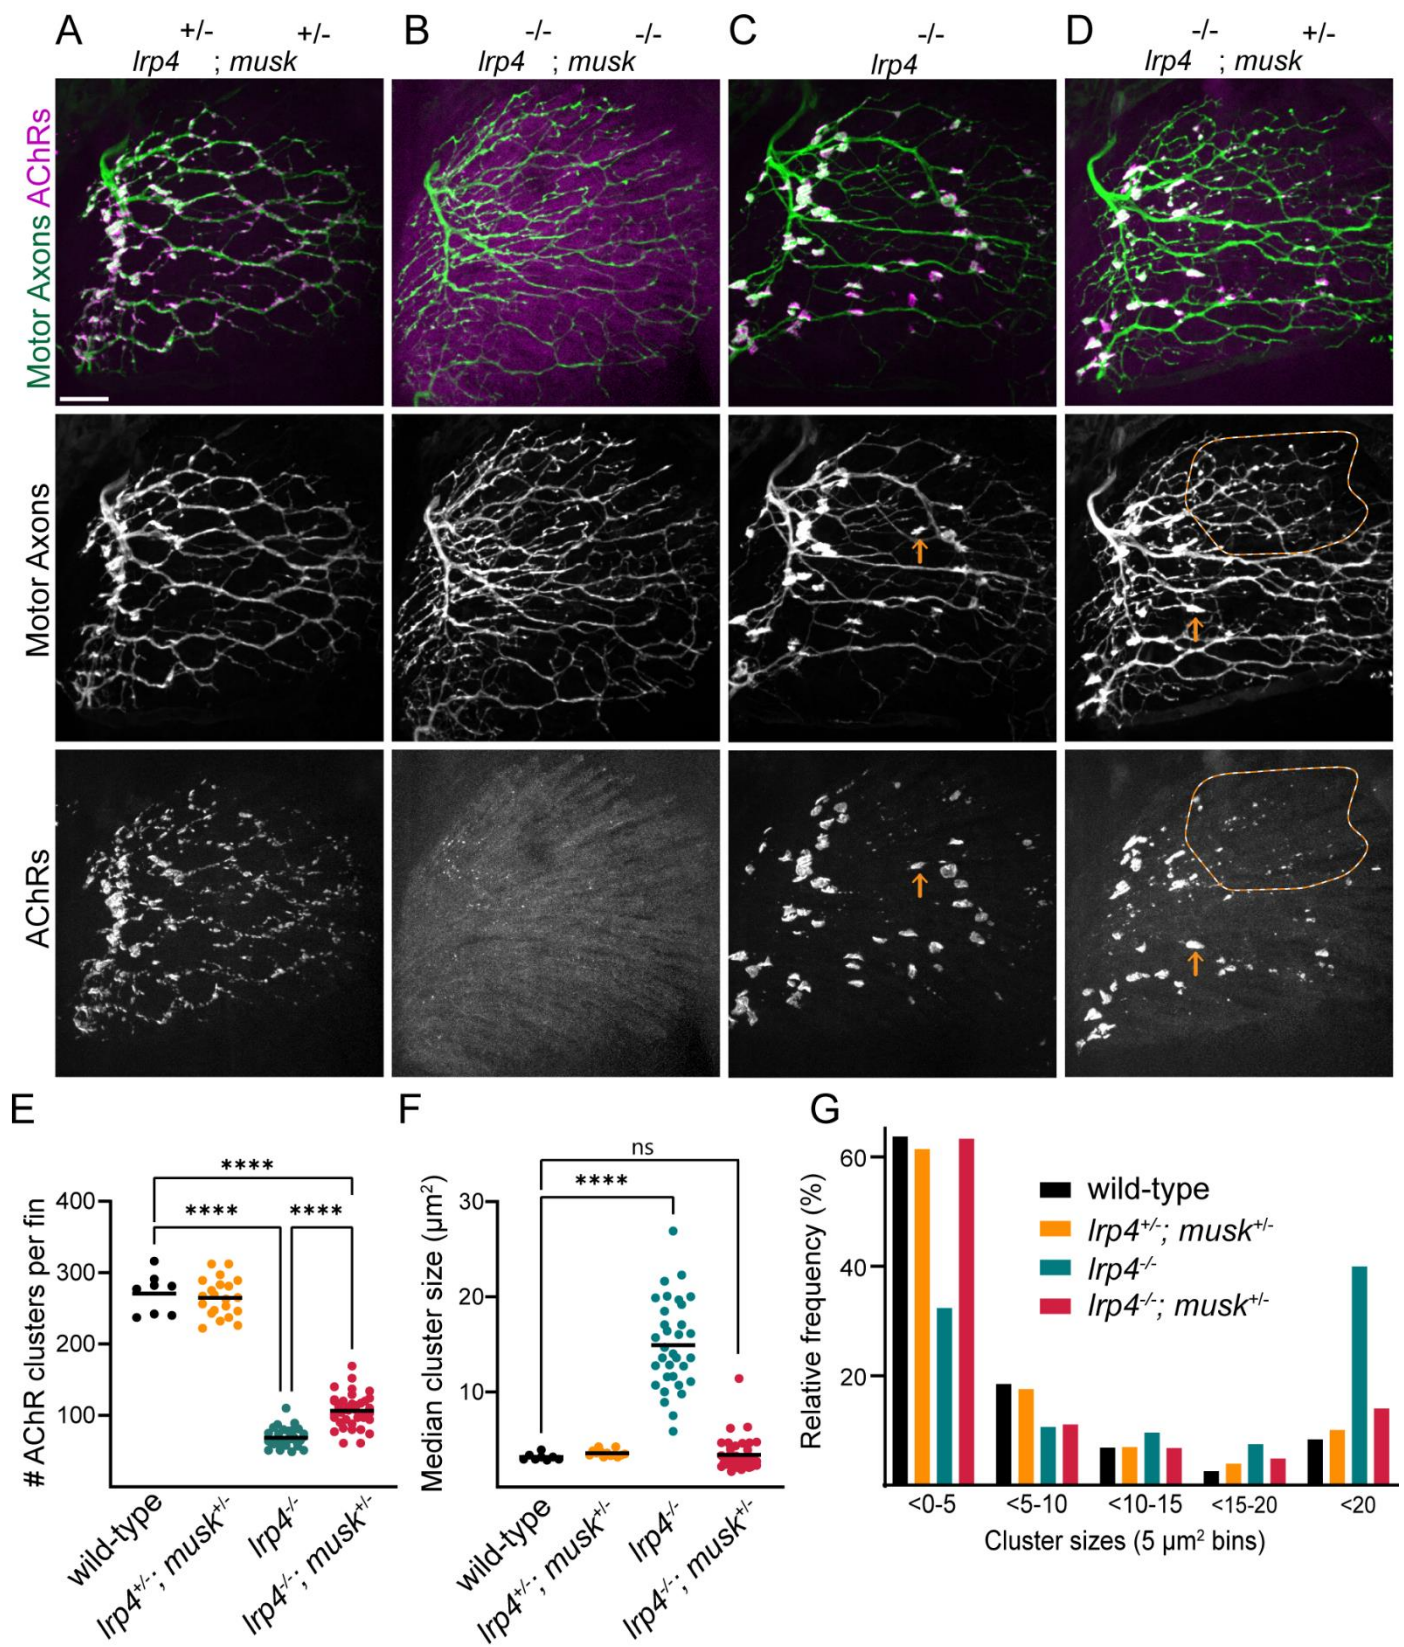

877

878

879

**Figure 8**

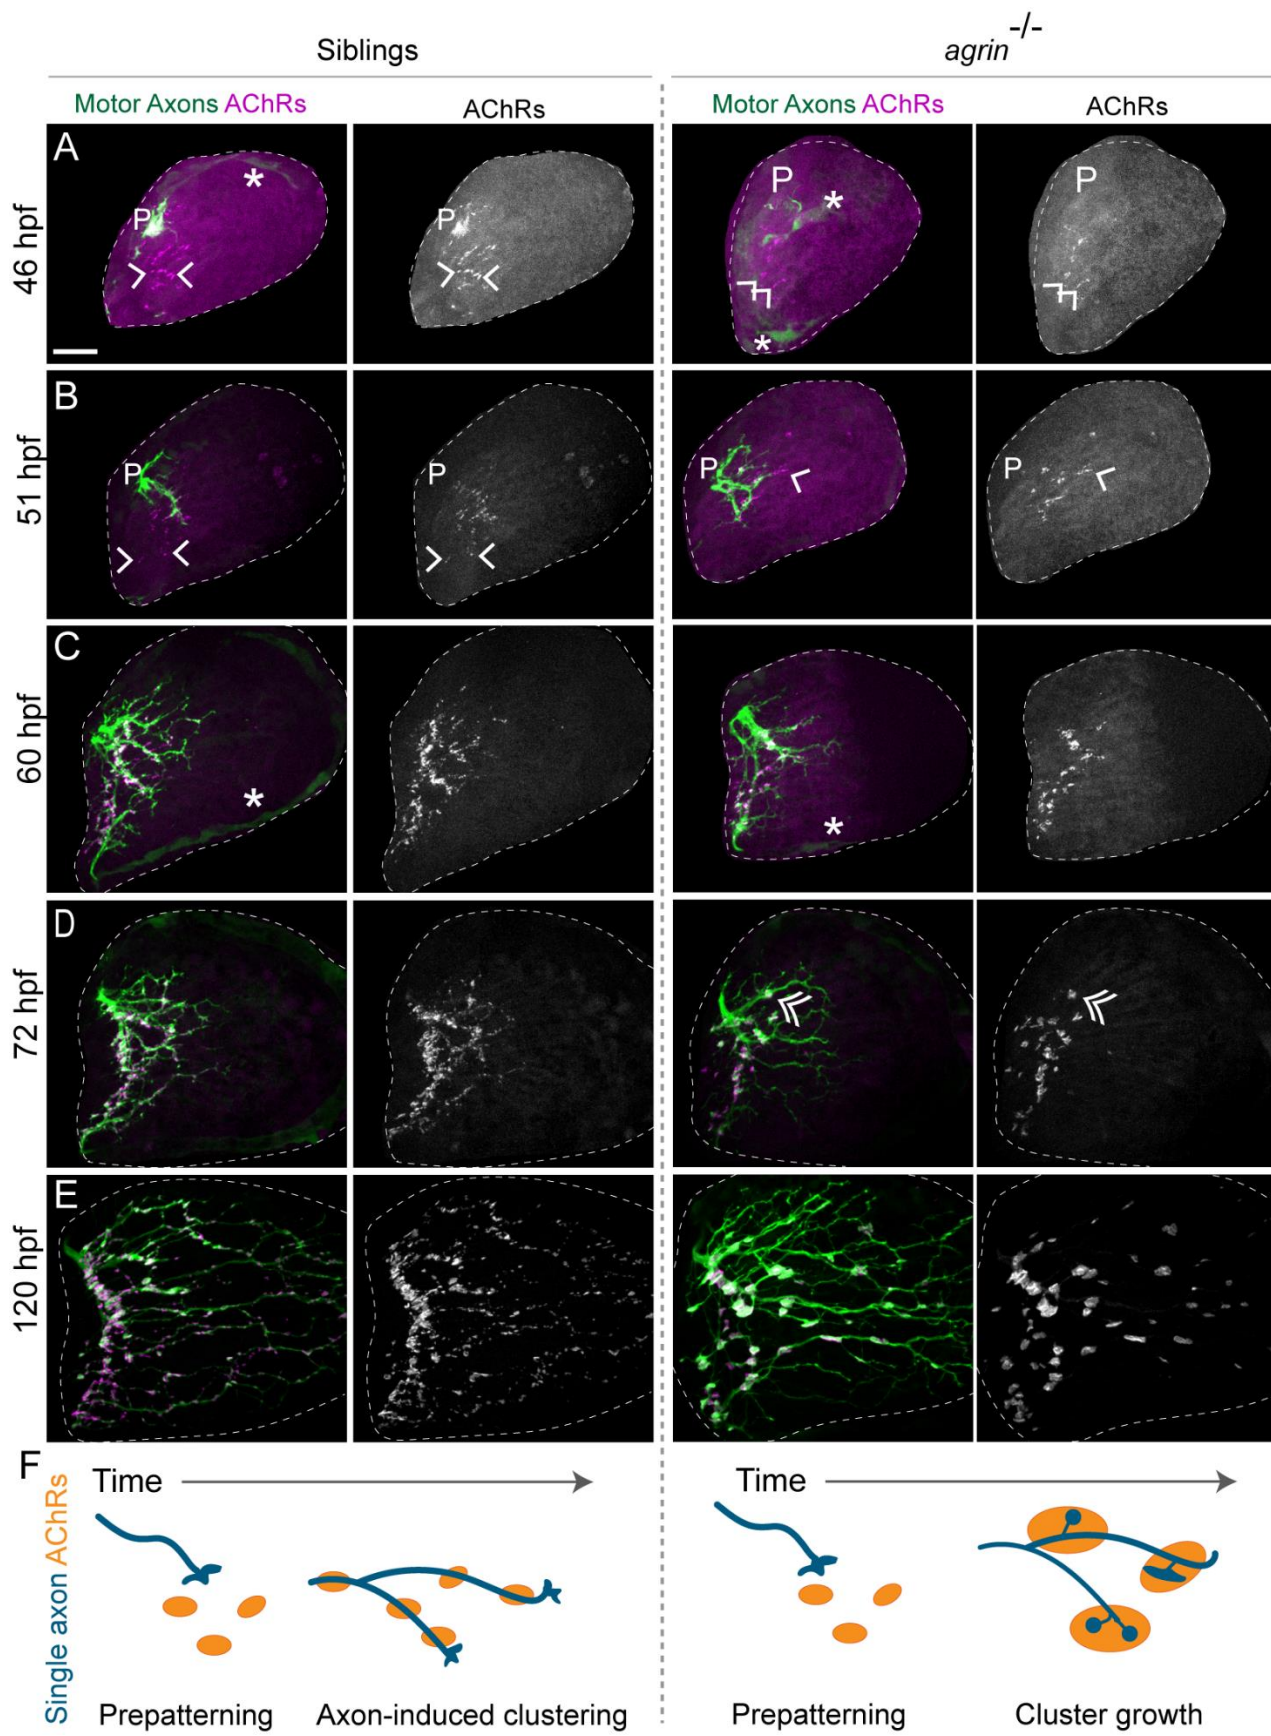

880
